# Supplementary material for: Incidence of and social-demographic and obstetric factors associated with postpartum depression: differences among ethnic Han and Kazak women of Northwestern China
Source: PeerJ. 2018 Jan 29;6:e4335. doi: 10.7717/peerj.4335 (PMC5793707; doi:10.7717/peerj.4335)
Supplement: Supplemental Information 1 [file peerj-06-4335-s001.xlsx]

## Sheet: raw data
	1=Han;0=Kazak		0=yes;1=no	0=Junior middle school or below;1= above junior middle school	0=yes 1=no	0=income＜2000;1=income＜2000	0=yes;1=no	0=yes;1=no	0=yes;1=no	0=yes;1=no	0=yes;1=no	0=yes;1=no	0=yes;1=no	0=mother-in-law;1=others	0=yes;1=no	0=yes;1=no	1=yes;0=no
number	Race	Age	Religion	Education	Stable job	Household income	Smoking history	Drinking history	Abortion history	Multiparous	Unplanned pregnancy	Cesarean section	Female infant	Caregiver after birth	Infant feeding	UI	PPD
3	0	27	1	0	0	0	0	1	0	0	0	1	0	0	1	0	1
4	0	28	0	0	0	1	1	1	0	1	0	0	0	1	1	1	1
6	0	37	0	1	1	1	1	1	0	0	0	0	1	1	1	1	1
7	0	29	0	0	0	0	0	1	0	0	0	1	0	0	1	0	1
8	0	22	0	0	0	0	1	1	0	0	0	1	1	1	1	0	1
11	0	31	0	1	0	1	0	1	0	1	0	1	1	1	1	1	1
12	0	26	0	1	0	0	1	1	0	1	0	1	0	0	1	0	1
16	0	25	0	0	0	0	1	1	0	1	0	0	0	1	1	1	1
17	0	25	0	1	0	0	1	1	0	0	0	1	0	1	1	0	1
20	0	22	0	0	0	0	1	1	0	0	0	0	0	1	1	0	1
21	0	25	0	0	0	0	1	1	1	0	1	0	0	0	1	1	1
23	0	30	0	0	0	0	1	1	0	0	1	1	1	1	1	1	1
28	0	27	0	1	1	1	1	1	0	1	0	1	1	1	1	0	1
30	0	30	0	0	0	0	1	1	1	0	1	0	0	0	1	1	1
32	0	24	0	0	0	0	1	1	0	0	0	1	1	1	1	0	1
44	0	31	0	1	1	1	1	0	1	0	1	1	1	0	1	1	1
46	0	27	0	0	0	0	0	0	0	1	0	1	0	1	1	1	1
48	0	29	0	0	1	0	1	1	1	0	1	1	1	0	1	0	1
49	0	27	0	1	1	0	0	0	1	0	1	1	1	0	1	1	1
54	0	34	0	0	0	1	1	1	1	1	1	0	0	1	1	1	1
57	0	25	0	0	0	0	1	1	1	1	1	1	1	1	1	1	1
58	0	25	0	0	0	0	1	1	0	0	1	1	0	1	1	0	1
66	0	25	0	0	0	0	1	1	0	0	1	0	0	1	1	1	1
69	0	29	0	0	1	0	1	1	1	1	1	1	0	1	1	1	1
77	0	26	0	0	0	0	1	1	0	0	1	1	0	0	1	1	1
78	0	27	0	1	0	0	1	1	0	1	1	1	1	1	1	0	1
80	0	22	0	0	0	0	1	1	0	1	1	1	1	1	1	0	1
86	0	25	0	0	0	0	1	1	1	0	1	0	0	0	1	1	1
93	0	26	0	1	0	0	0	1	0	0	1	0	1	1	1	1	1
95	0	29	0	0	0	0	1	1	1	0	1	1	1	0	1	0	1
96	0	24	0	1	0	0	1	1	0	1	0	1	0	1	1	0	1
100	0	26	0	0	0	0	1	1	0	0	1	0	0	1	1	1	1
101	0	26	0	0	0	0	1	1	1	0	1	1	0	0	1	1	1
102	0	28	0	1	0	1	1	1	1	0	0	0	1	1	1	0	1
103	0	33	0	0	0	0	1	1	1	0	1	1	0	1	0	0	1
107	0	26	0	0	0	0	1	1	0	1	1	1	0	1	1	0	1
114	0	29	0	1	0	0	1	1	0	0	1	0	0	1	1	0	1
116	0	31	0	0	0	0	1	1	0	0	1	0	1	1	1	1	1
119	0	28	0	1	1	1	1	1	1	1	1	0	1	1	1	1	1
127	0	28	0	0	0	0	1	1	1	0	1	0	0	0	1	1	1
129	0	25	0	0	0	0	1	1	0	0	1	0	0	1	1	0	1
130	0	28	0	0	0	0	1	1	0	0	1	0	0	1	1	1	1
132	0	23	0	0	0	0	1	1	1	0	1	1	1	0	1	0	1
134	0	27	0	0	0	0	1	1	1	0	1	0	0	0	1	1	1
137	0	25	0	0	0	0	1	1	0	1	1	1	1	1	1	0	1
148	0	22	0	0	0	0	1	1	0	1	1	1	0	0	1	0	1
163	0	28	0	0	0	0	1	1	1	0	1	1	0	0	1	1	1
197	0	27	0	0	0	1	1	1	1	0	1	1	0	1	1	1	1
251	0	32	0	1	1	0	1	1	1	0	0	1	0	1	1	1	1
272	0	38	0	0	0	0	1	1	1	0	1	1	0	0	1	1	1
293	0	29	0	0	1	0	1	1	1	0	0	1	0	0	1	1	1
296	0	26	0	1	0	1	1	1	1	1	0	1	0	1	0	1	1
328	0	27	0	1	1	1	1	1	1	0	1	1	1	1	1	1	1
330	0	18	0	1	0	1	1	1	1	1	0	0	1	1	1	0	1
331	0	25	0	0	0	0	1	1	1	0	1	1	0	1	1	0	1
333	0	31	0	0	0	1	1	1	0	0	0	0	0	0	0	0	1
335	0	28	0	0	0	1	1	1	0	1	1	1	0	1	0	1	1
336	0	26	0	0	0	1	1	1	1	1	1	1	1	1	1	1	1
337	0	27	0	0	0	1	1	1	1	0	0	1	0	1	1	1	1
338	0	31	0	0	1	1	1	1	1	0	1	1	1	1	1	1	1
339	0	31	0	0	0	1	1	1	1	0	1	1	1	1	1	1	1
340	0	32	0	0	0	1	1	1	1	0	1	1	1	1	1	1	1
342	0	28	0	0	0	1	1	1	0	0	0	1	0	1	1	1	1
343	0	30	0	0	0	0	1	1	1	0	1	1	0	1	0	1	1
345	0	33	0	0	1	1	1	1	0	0	1	0	1	1	0	0	1
346	0	27	0	0	0	0	1	1	0	0	0	1	0	1	0	1	1
351	0	33	0	1	0	1	1	1	1	1	1	1	1	1	1	1	1
355	0	32	0	0	0	0	1	1	0	0	1	0	1	0	1	1	1
356	0	19	0	0	0	0	1	1	1	0	0	0	0	0	1	1	1
358	0	26	0	0	0	0	1	1	0	0	1	0	0	0	0	0	1
360	0	29	0	0	1	0	1	1	1	0	0	0	0	1	1	0	1
361	0	19	0	0	0	0	1	1	1	1	1	0	1	1	1	0	1
362	0	25	0	0	0	0	1	1	0	1	1	0	1	0	0	0	1
363	0	31	0	0	0	0	1	1	1	0	0	1	0	1	0	1	1
368	0	23	0	0	0	0	1	1	1	1	1	0	1	1	1	0	1
371	0	33	0	0	1	0	1	1	1	0	0	1	1	1	1	1	1
372	0	33	0	0	1	0	1	1	1	0	1	1	1	1	1	1	1
373	0	38	0	0	0	0	1	1	1	0	1	1	1	1	1	1	1
374	0	30	0	1	0	0	1	1	1	0	0	1	1	1	1	1	1
375	0	22	0	0	0	0	1	1	1	0	1	1	0	1	0	1	1
378	0	40	0	0	1	0	1	1	0	0	1	1	1	1	1	0	1
379	0	35	0	0	0	0	1	1	1	0	1	1	0	1	0	1	1
380	0	24	0	0	0	1	1	1	1	0	1	1	1	1	1	1	1
384	0	20	0	0	0	0	1	1	1	1	1	0	1	1	1	1	1
387	0	36	0	0	0	0	1	1	1	0	1	1	0	1	1	0	1
393	0	38	0	0	0	1	1	1	1	0	1	1	0	1	1	0	1
394	0	32	0	0	0	0	1	1	1	0	1	1	0	1	1	0	1
395	0	21	0	0	0	0	1	1	1	1	1	0	1	1	1	1	1
396	0	21	0	0	0	0	1	1	1	0	0	0	0	0	1	0	1
397	0	37	0	0	1	1	1	1	1	0	0	1	1	1	1	1	1
400	0	34	0	0	0	0	1	1	0	0	1	0	1	1	0	1	1
402	0	22	0	0	0	0	1	1	0	0	1	0	1	0	1	1	1
403	0	24	0	0	0	0	1	1	1	0	1	0	0	0	1	1	1
404	0	18	0	0	0	0	1	1	0	1	0	1	0	0	1	0	1
405	0	32	0	0	0	1	1	1	0	0	1	1	0	1	0	1	1
406	0	32	0	0	0	1	1	1	1	0	1	1	1	0	1	0	1
560	0	30	0	0	0	0	1	1	1	1	1	0	1	1	1	1	1
567	0	29	0	1	1	1	1	1	1	0	0	0	0	1	1	0	1
913	0	36	0	0	0	1	1	1	1	1	1	1	0	1	0	1	1
929	0	28	0	1	1	1	1	1	1	1	1	0	0	1	1	1	1
1	0	30	0	0	0	0	1	1	1	0	1	1	1	1	1	1	0
5	0	32	0	0	0	0	1	1	1	0	0	0	1	1	1	0	0
9	0	33	0	1	1	1	0	1	0	0	1	1	0	1	1	1	0
13	0	32	0	1	0	0	1	1	0	0	1	0	0	1	1	0	0
14	0	27	0	1	0	0	1	1	1	1	1	0	1	0	1	1	0
15	0	29	0	0	0	0	1	1	1	0	1	1	0	1	1	0	0
18	0	21	0	0	0	0	1	1	0	0	1	1	0	1	1	0	0
19	0	27	0	1	1	0	1	1	0	0	1	1	0	1	1	0	0
22	0	27	0	0	0	0	1	1	0	0	0	1	1	1	1	0	0
24	0	32	0	0	0	0	1	1	0	0	1	1	0	1	1	1	0
25	0	30	0	0	0	0	1	1	1	1	1	0	0	0	1	1	0
26	0	32	0	0	0	0	1	1	1	0	1	0	1	1	1	1	0
27	0	28	0	1	0	0	1	1	0	0	1	0	0	1	1	1	0
29	0	36	0	1	1	1	1	1	1	0	0	1	1	1	1	1	0
31	0	26	0	1	1	1	1	1	0	1	1	1	0	1	1	0	0
33	0	27	0	1	0	0	1	1	1	0	0	1	0	0	1	0	0
34	0	24	0	0	0	0	0	1	1	1	1	1	1	0	1	0	0
35	0	40	0	1	0	0	1	1	0	0	1	0	1	1	1	0	0
36	0	33	0	1	0	0	1	1	1	0	0	1	0	1	1	1	0
37	0	28	0	1	1	0	1	1	0	0	1	1	0	1	1	0	0
38	0	32	0	1	0	0	1	1	1	0	1	1	0	1	1	0	0
39	0	26	0	0	0	0	1	1	1	0	0	1	0	1	1	1	0
40	0	27	0	1	1	1	0	0	1	1	1	1	1	1	1	1	0
41	0	25	0	1	0	0	1	1	1	1	1	0	1	0	1	1	0
42	0	25	0	1	0	0	1	1	1	1	1	0	0	0	1	1	0
43	0	30	0	1	0	1	1	1	1	0	1	1	0	1	1	1	0
45	0	31	0	0	0	0	1	1	0	0	1	1	0	1	1	1	0
47	0	32	0	0	0	0	0	0	1	0	0	1	1	1	1	1	0
50	0	39	0	1	1	1	0	0	1	0	1	0	1	0	1	1	0
51	0	30	0	0	1	0	0	0	1	0	1	1	0	0	1	1	0
52	0	27	0	0	0	0	1	1	0	0	0	1	1	1	1	1	0
53	0	25	0	1	1	1	0	0	1	1	1	1	1	0	1	1	0
55	0	24	0	0	0	0	1	1	1	1	1	1	1	1	1	0	0
56	0	31	0	0	0	0	0	1	1	0	1	1	0	0	1	0	0
59	0	28	0	0	0	0	1	1	1	0	1	1	1	1	1	1	0
60	0	23	0	0	0	0	1	1	0	0	1	1	0	1	1	1	0
61	0	30	0	0	0	0	1	1	0	0	1	0	1	1	1	1	0
62	0	28	0	1	1	1	1	1	1	1	1	1	1	0	1	1	0
63	0	34	0	0	0	0	1	1	0	0	1	1	0	1	1	0	0
64	0	25	0	0	0	0	1	1	1	1	1	1	0	1	1	1	0
65	0	27	0	1	1	1	1	1	1	1	1	1	0	1	1	1	0
67	0	27	0	0	0	0	0	1	1	0	0	0	1	1	1	1	0
68	0	29	0	0	1	1	0	1	1	1	1	1	0	1	1	1	0
70	0	24	0	0	0	0	1	1	1	1	1	1	1	0	1	1	0
71	0	30	0	0	0	0	1	1	1	0	1	0	1	1	1	1	0
72	0	27	0	1	1	1	1	0	1	1	1	1	0	1	1	1	0
73	0	25	0	0	0	0	1	0	1	1	1	1	0	1	1	1	0
74	0	29	0	1	1	1	1	1	1	1	1	1	1	1	1	1	0
75	0	25	0	0	0	0	1	1	0	0	1	0	1	1	1	1	0
76	0	24	0	0	0	0	1	1	1	0	1	1	1	1	1	0	0
79	0	27	0	0	1	0	1	1	1	0	1	0	0	1	1	1	0
81	0	28	0	0	0	0	1	1	0	0	1	1	0	1	1	1	0
82	0	26	0	0	0	0	1	1	1	1	0	0	1	1	1	1	0
83	0	37	0	0	0	0	1	1	0	0	1	0	1	1	1	1	0
84	0	31	0	0	0	0	1	1	0	0	1	0	1	1	1	1	0
85	0	27	0	1	0	0	1	1	1	0	1	1	0	0	1	0	0
87	0	29	0	0	0	1	1	1	1	0	0	1	0	1	1	1	0
88	0	40	0	0	0	0	1	1	1	0	0	0	1	1	1	1	0
89	0	33	0	0	0	0	1	1	1	0	1	0	1	1	1	1	0
90	0	18	0	0	0	0	1	1	1	1	1	1	1	0	1	1	0
91	0	32	0	0	0	0	0	1	1	0	1	1	0	0	1	1	0
92	0	36	0	1	0	0	1	1	0	0	1	0	0	1	1	0	0
94	0	32	0	1	1	1	0	1	1	0	0	0	0	1	1	1	0
97	0	30	0	0	0	1	0	1	0	0	1	1	0	1	1	0	0
98	0	25	0	0	0	0	1	1	1	0	0	1	1	1	1	0	0
99	0	23	0	1	0	0	1	1	1	1	1	1	1	0	1	1	0
104	0	25	0	0	0	0	1	1	1	0	0	1	0	1	1	1	0
105	0	30	0	0	0	0	1	1	1	1	1	1	0	0	1	1	0
106	0	30	0	1	0	0	1	1	0	1	1	1	0	1	1	0	0
108	0	31	0	1	0	0	0	1	0	0	1	1	1	1	1	1	0
109	0	34	0	0	0	0	1	1	0	0	1	1	0	1	1	0	0
110	0	31	0	0	0	0	1	1	1	0	1	1	1	1	1	0	0
111	0	32	0	0	0	1	1	1	1	0	1	1	0	1	1	0	0
112	0	27	0	0	0	0	1	1	1	0	1	1	0	1	1	0	0
113	0	26	0	1	0	1	1	1	1	0	1	1	0	1	1	1	0
115	0	28	0	0	0	0	1	1	0	0	1	0	0	1	1	1	0
117	0	26	0	1	1	1	1	1	1	1	1	0	1	0	1	1	0
118	0	23	0	0	0	0	1	1	1	1	1	0	0	0	1	1	0
120	0	27	0	0	0	0	0	1	1	0	1	1	0	0	1	1	0
121	0	27	0	0	0	1	1	1	1	0	1	0	1	1	1	1	0
122	0	34	0	0	0	1	1	1	1	0	1	0	1	1	1	1	0
123	0	30	0	0	1	0	0	1	1	0	1	1	1	1	1	1	0
124	0	26	0	0	0	0	1	1	0	0	0	1	1	1	1	1	0
125	0	32	0	1	1	1	0	0	1	0	1	0	1	1	1	1	0
126	0	24	0	0	0	1	0	1	1	1	1	1	0	0	1	0	0
128	0	26	0	1	1	1	0	1	1	1	1	1	1	0	1	1	0
131	0	31	0	1	1	1	1	1	1	0	1	0	1	1	1	1	0
133	0	33	0	0	0	0	1	1	0	0	1	1	1	1	1	0	0
135	0	25	0	0	0	0	1	1	1	0	0	0	1	1	1	1	0
136	0	26	0	1	1	1	0	1	1	1	1	1	1	0	1	1	0
138	0	28	0	0	0	0	1	1	0	0	1	1	0	1	1	1	0
139	0	27	0	0	0	0	0	1	1	0	1	1	1	0	1	0	0
140	0	24	0	0	0	1	1	0	1	1	1	1	0	0	1	1	0
141	0	28	0	1	1	1	1	1	1	1	1	1	0	1	1	0	0
142	0	23	0	0	0	0	0	1	1	1	1	1	0	0	1	1	0
143	0	24	0	0	0	0	1	1	0	0	1	0	1	1	1	1	0
144	0	30	0	1	1	1	0	1	1	0	1	0	0	1	1	1	0
145	0	29	0	0	0	0	1	1	1	1	1	0	0	0	1	1	0
146	0	26	0	0	0	0	1	1	0	0	1	1	0	1	1	1	0
147	0	22	0	0	0	0	1	1	1	1	1	1	0	1	1	1	0
149	0	32	0	0	0	0	0	0	1	0	1	1	0	1	1	1	0
150	0	25	0	1	1	1	0	1	0	0	1	1	1	1	1	1	0
151	0	26	0	0	0	0	1	1	1	1	1	1	0	1	1	1	0
152	0	28	0	0	0	1	1	1	1	1	1	1	0	1	1	1	0
153	0	25	0	1	0	1	1	1	0	1	0	1	1	1	1	1	0
154	0	29	0	0	0	0	1	1	1	1	1	1	0	1	1	1	0
155	0	35	0	1	1	1	1	1	1	0	1	1	1	1	1	1	0
156	0	36	0	1	1	1	1	1	1	1	1	0	0	1	1	1	0
157	0	39	0	1	1	1	1	1	1	0	1	0	1	1	1	1	0
158	0	26	0	0	0	0	1	1	1	0	1	0	1	1	1	1	0
159	0	25	0	0	0	0	1	1	1	0	1	1	1	1	1	1	0
160	0	27	0	0	0	0	1	1	1	1	1	1	0	0	1	1	0
161	0	34	0	0	0	0	1	1	1	0	1	1	0	1	1	1	0
162	0	27	0	1	1	1	1	1	1	1	1	1	1	1	1	1	0
164	0	24	0	0	0	0	1	1	1	0	1	1	1	1	1	0	0
165	0	33	0	1	0	1	1	1	1	0	1	1	1	1	1	1	0
166	0	28	0	0	0	0	1	1	1	0	1	1	1	1	1	1	0
167	0	39	0	0	0	0	1	1	1	0	1	1	1	1	1	0	0
168	0	23	0	1	1	0	1	1	1	0	1	1	1	1	1	0	0
169	0	27	0	0	1	1	1	0	1	1	1	1	1	1	1	1	0
170	0	25	0	1	1	1	1	1	1	1	1	1	0	1	1	1	0
171	0	29	0	0	0	0	1	1	1	1	1	1	1	1	1	0	0
172	0	23	0	0	0	0	1	1	1	1	1	1	1	1	1	1	0
173	0	23	0	0	0	0	1	1	1	0	1	1	0	0	1	1	0
174	0	27	0	0	0	0	1	1	1	1	1	0	1	0	0	1	0
175	0	26	0	0	0	0	1	1	1	0	1	1	0	1	1	1	0
176	0	27	0	0	0	0	1	1	1	0	1	1	1	1	1	1	0
177	0	30	0	0	0	0	1	1	1	0	1	0	1	1	1	1	0
178	0	40	0	0	0	0	1	1	1	0	1	1	1	1	1	1	0
179	0	28	0	0	0	0	1	1	1	0	1	1	0	0	1	1	0
180	0	23	0	1	0	0	1	1	0	1	0	1	1	1	1	0	0
181	0	31	0	0	0	0	1	1	1	1	1	0	1	1	0	1	0
182	0	30	0	0	0	1	1	1	1	0	1	0	0	1	0	1	0
183	0	34	0	1	1	1	1	1	1	0	1	0	1	1	0	1	0
184	0	25	0	0	0	0	1	1	1	1	1	1	1	0	1	1	0
185	0	16	0	0	0	0	1	1	1	1	1	1	1	1	1	1	0
186	0	20	0	0	0	0	1	1	0	0	0	1	1	1	1	1	0
187	0	26	0	0	0	0	1	1	1	0	1	1	1	1	1	1	0
188	0	21	0	1	0	0	1	1	1	1	1	1	0	0	1	1	0
189	0	25	0	0	1	0	1	1	1	0	1	0	1	1	1	1	0
190	0	29	0	0	0	0	1	1	1	0	1	0	0	1	1	1	0
191	0	26	0	1	0	0	1	1	1	1	1	1	1	1	1	1	0
192	0	30	0	0	0	0	1	1	1	0	1	1	1	0	1	1	0
193	0	21	0	1	0	0	1	1	1	0	1	1	1	0	1	1	0
194	0	28	0	1	1	1	1	1	1	0	1	0	1	1	1	1	0
195	0	26	0	0	0	0	1	1	1	0	1	0	1	1	1	1	0
196	0	34	0	0	0	0	1	1	1	0	1	1	0	1	1	1	0
198	0	37	0	0	0	0	1	1	1	0	1	0	0	0	1	1	0
199	0	30	0	0	0	0	1	1	1	0	1	0	0	1	0	0	0
200	0	38	0	1	0	0	1	1	1	0	1	0	1	1	1	1	0
201	0	34	0	1	1	0	1	1	0	0	0	1	1	1	1	1	0
202	0	39	0	0	1	0	1	1	1	0	1	0	1	1	1	1	0
203	0	30	0	0	0	0	1	1	1	0	1	0	0	1	1	1	0
204	0	36	0	1	1	1	1	1	1	0	1	1	0	1	1	1	0
205	0	20	0	1	0	0	1	1	1	1	1	1	0	1	1	0	0
206	0	22	0	1	0	1	1	1	0	1	0	1	0	1	1	1	0
207	0	25	0	1	0	0	1	1	1	1	1	1	0	0	1	1	0
208	0	21	0	1	0	0	1	1	1	1	1	1	0	0	1	1	0
209	0	38	0	1	0	0	1	1	1	0	1	0	1	1	1	1	0
210	0	27	0	0	0	0	1	1	1	0	1	1	0	0	1	1	0
211	0	27	0	0	1	1	1	1	1	1	1	0	0	1	0	1	0
212	0	22	0	1	1	0	1	1	1	1	1	0	0	1	0	1	0
213	0	24	0	0	1	0	1	1	1	1	1	1	0	0	1	1	0
214	0	35	0	1	1	0	1	1	1	0	1	1	0	1	1	0	0
215	0	31	0	0	1	0	1	1	1	0	1	0	0	1	1	1	0
216	0	31	0	1	1	1	1	1	0	1	0	0	1	1	0	0	0
217	0	25	0	0	1	0	1	1	1	0	1	1	0	0	1	0	0
218	0	36	0	0	1	0	1	1	1	0	1	0	1	1	1	1	0
219	0	39	0	0	1	0	1	1	1	0	1	1	1	1	1	1	0
220	0	29	0	0	1	0	1	1	1	1	1	1	1	0	1	1	0
221	0	30	0	0	0	0	1	1	1	0	1	1	0	0	1	1	0
222	0	24	0	0	1	0	1	1	1	1	1	0	1	1	0	1	0
223	0	31	0	1	0	1	1	1	0	1	0	1	1	1	1	1	0
224	0	33	1	0	0	0	1	1	1	0	1	0	1	0	1	1	0
225	0	25	0	0	0	0	1	1	1	0	1	0	1	1	1	1	0
226	0	29	0	1	1	1	1	1	1	0	1	0	1	1	0	1	0
227	0	25	0	0	0	0	1	1	1	0	1	1	0	1	1	1	0
228	0	30	0	0	0	1	1	1	0	0	0	0	1	1	0	1	0
229	0	24	0	0	0	0	1	1	1	1	1	1	0	0	1	1	0
230	0	27	0	1	1	0	1	1	1	1	1	1	0	1	1	1	0
231	0	23	0	1	0	0	1	1	1	1	1	1	0	0	1	1	0
232	0	26	0	0	0	0	1	1	1	1	1	1	1	1	1	1	0
233	0	31	0	0	0	0	1	1	1	1	1	1	0	1	1	0	0
234	0	26	0	0	0	0	1	1	1	0	1	1	0	0	1	0	0
235	0	31	0	1	1	0	1	1	0	1	0	1	0	1	1	0	0
236	0	27	0	1	1	1	1	1	0	1	0	0	1	1	0	1	0
237	0	24	0	0	0	0	1	1	1	1	1	1	1	0	1	1	0
238	0	39	0	0	0	0	1	1	1	0	1	1	1	0	1	1	0
239	0	31	0	1	1	0	1	1	1	1	1	1	1	1	1	1	0
240	0	27	0	0	0	0	1	1	0	1	0	1	0	1	1	1	0
241	0	32	0	0	0	0	1	1	1	0	1	1	1	1	1	0	0
242	0	25	0	0	0	0	1	1	1	0	1	0	1	1	1	1	0
243	0	28	0	0	0	0	1	1	1	0	1	0	1	1	1	1	0
244	0	26	0	1	0	0	1	1	1	0	1	1	1	1	1	1	0
245	0	27	0	0	0	0	1	1	1	0	1	1	1	1	1	1	0
246	0	25	0	0	0	0	1	1	1	1	1	1	0	1	1	1	0
247	0	20	0	0	0	0	1	1	1	0	1	1	1	0	1	1	0
248	0	24	0	0	0	0	1	1	1	0	1	1	0	0	1	1	0
249	0	36	0	1	0	1	1	1	1	0	1	0	0	1	0	1	0
250	0	37	1	0	0	0	1	1	1	0	1	1	0	1	1	1	0
252	0	24	0	0	0	0	1	1	1	0	1	0	0	0	1	1	0
253	0	26	0	0	0	0	1	1	1	0	1	0	1	1	1	1	0
254	0	31	0	0	0	0	1	1	1	0	1	1	1	1	1	1	0
255	0	25	0	0	0	0	1	1	1	0	1	1	1	1	1	1	0
256	0	25	0	0	0	0	1	1	1	0	1	1	1	1	1	1	0
257	0	30	0	0	0	0	1	1	0	0	0	1	1	1	1	1	0
258	0	28	0	1	1	0	1	1	1	0	1	0	1	1	1	1	0
259	0	23	0	1	0	0	1	1	1	1	1	1	1	0	1	1	0
260	0	26	0	1	0	1	1	1	1	1	1	0	0	0	0	1	0
261	0	32	0	0	0	0	0	0	1	0	1	1	0	1	1	1	0
262	0	31	0	0	0	0	1	1	1	0	1	0	1	1	1	1	0
263	0	33	0	0	0	0	1	1	0	0	0	1	1	1	1	1	0
264	0	28	0	1	0	1	1	1	1	0	1	1	1	1	1	1	0
265	0	33	0	0	0	0	1	1	1	0	1	0	1	1	1	1	0
266	0	31	0	0	0	1	1	1	1	1	1	1	0	1	1	1	0
267	0	28	0	0	0	0	1	1	1	0	1	1	1	1	1	1	0
268	0	25	0	0	0	0	1	1	1	0	1	0	1	1	1	1	0
269	0	39	0	0	0	0	1	1	1	0	1	1	1	1	1	1	0
270	0	25	0	1	1	1	1	1	1	1	1	0	1	1	0	1	0
271	0	28	0	0	0	0	1	1	1	1	1	1	0	0	1	0	0
273	0	37	0	0	0	0	1	1	1	0	1	1	1	1	1	0	0
274	0	29	0	0	0	0	1	1	1	0	1	0	0	1	0	1	0
275	0	30	0	1	0	0	1	1	1	1	1	1	1	0	1	1	0
276	0	28	0	0	0	1	1	1	0	0	0	1	1	1	1	0	0
277	0	27	0	0	0	0	1	1	1	1	1	1	1	0	1	1	0
278	0	28	0	1	1	0	1	1	1	1	1	1	0	0	1	1	0
279	0	33	0	1	1	1	1	1	1	0	1	1	0	0	1	1	0
280	0	26	0	1	1	1	1	1	1	1	1	1	1	0	1	1	0
281	0	26	0	0	0	0	1	1	1	1	1	1	0	1	1	1	0
282	0	24	0	1	0	1	1	1	1	1	1	1	1	1	1	0	0
283	0	32	0	0	0	0	1	1	1	1	1	1	1	1	1	1	0
284	0	26	0	1	0	1	1	1	1	0	1	0	1	1	0	1	0
285	0	28	0	1	0	0	1	1	1	1	1	1	0	0	1	1	0
286	0	25	0	0	0	0	1	1	1	1	1	1	1	1	1	1	0
287	0	26	0	0	0	0	1	1	1	1	1	1	0	1	1	1	0
288	0	20	0	1	1	1	1	1	1	1	1	0	0	0	0	1	0
289	0	38	0	0	0	0	1	1	1	1	1	1	1	1	1	0	0
290	0	30	0	0	0	0	1	1	1	0	1	1	0	1	1	1	0
291	0	27	0	1	1	1	1	1	1	0	1	0	0	1	0	1	0
292	0	27	0	0	0	0	1	1	0	0	0	1	1	1	1	0	0
294	0	25	0	1	0	0	1	1	0	0	0	1	1	1	1	1	0
295	0	23	0	0	0	0	1	1	1	1	1	1	1	0	1	1	0
297	0	32	0	0	0	1	1	1	0	0	0	1	1	1	1	1	0
298	0	31	0	1	0	0	1	1	1	0	1	1	1	1	1	1	0
299	0	28	0	0	0	0	1	1	1	1	1	1	0	0	1	1	0
300	0	26	0	0	0	1	1	1	1	0	1	1	1	0	1	1	0
301	0	29	0	0	0	0	1	1	1	0	1	1	0	1	1	1	0
302	0	23	1	1	1	1	1	1	0	1	0	0	1	1	0	1	0
306	0	28	0	1	1	1	1	1	0	1	0	0	1	1	1	1	0
308	0	27	0	1	0	1	1	1	0	1	1	0	0	1	0	1	0
311	0	23	1	1	0	1	1	1	0	1	1	1	0	1	1	1	0
313	0	43	0	1	1	1	1	1	0	0	1	0	1	1	1	0	0
316	0	31	0	0	0	1	1	1	0	1	1	1	1	0	1	1	0
319	0	24	0	1	1	1	1	1	0	0	1	0	0	1	0	0	0
323	0	25	0	1	0	1	1	1	0	0	0	1	0	1	1	1	0
327	0	17	0	1	0	0	1	1	0	0	1	1	1	1	1	0	0
329	0	29	0	1	1	1	1	1	1	0	1	1	0	1	1	0	0
332	0	31	0	0	0	1	1	1	0	0	1	1	1	1	1	0	0
334	0	28	0	0	0	1	1	1	0	0	0	1	1	1	1	0	0
341	0	24	0	1	0	1	1	1	1	0	1	0	0	1	1	0	0
344	0	30	0	0	0	0	1	1	0	0	1	0	1	1	1	0	0
347	0	30	0	0	0	0	1	1	0	0	1	0	1	1	1	0	0
348	0	31	0	0	0	0	1	1	0	0	1	0	1	1	1	0	0
349	0	29	0	0	0	0	1	1	0	0	1	1	1	1	1	0	0
350	0	29	0	1	0	0	1	1	0	0	1	1	1	1	1	0	0
352	0	23	0	1	0	0	1	1	1	1	1	0	0	0	1	1	0
353	0	27	0	0	0	1	1	1	1	0	1	0	1	1	0	1	0
354	0	32	0	0	0	0	1	1	1	0	1	1	1	1	1	1	0
357	0	28	0	0	0	0	1	1	1	0	1	1	1	1	1	1	0
359	0	38	0	0	0	0	1	1	1	0	1	1	1	1	1	1	0
364	0	25	0	0	0	0	1	1	0	0	1	1	1	1	1	0	0
365	0	35	0	0	0	0	1	1	0	0	1	0	0	0	1	0	0
366	0	25	0	0	0	0	1	1	1	0	1	1	1	1	1	1	0
367	0	26	0	0	0	0	1	1	0	0	1	0	0	0	1	0	0
369	0	41	0	0	0	1	1	1	0	0	0	1	1	1	1	0	0
370	0	32	0	0	0	0	1	1	0	0	1	0	0	0	1	0	0
376	0	38	0	0	0	0	1	1	0	0	1	1	1	1	1	0	0
377	0	29	0	0	1	0	1	1	1	0	1	0	0	0	1	1	0
381	0	32	0	0	0	0	1	1	1	0	1	1	1	1	1	1	0
382	0	17	0	0	0	0	1	1	0	1	1	1	1	0	1	1	0
383	0	31	0	0	0	0	1	1	1	0	1	1	1	1	1	1	0
385	0	25	0	0	0	0	1	1	0	0	1	0	1	1	1	0	0
386	0	31	0	0	0	0	1	1	0	0	1	0	1	1	1	0	0
388	0	32	0	0	0	0	1	1	0	0	1	0	0	0	1	0	0
390	0	27	0	0	0	1	1	1	0	0	1	0	1	1	1	0	0
391	0	33	0	0	0	0	1	1	0	0	1	0	0	0	0	1	0
392	0	34	0	0	0	0	1	1	0	0	1	0	1	1	1	0	0
398	0	29	0	0	0	0	1	1	0	0	1	0	1	1	1	0	0
399	0	28	0	0	0	0	1	1	0	0	0	1	1	1	1	1	0
399	0	31	0	0	0	0	1	1	1	0	1	0	0	0	1	0	0
401	0	35	0	0	0	0	1	1	0	0	1	0	1	1	1	0	0
407	0	26	0	0	0	0	1	1	1	1	1	1	0	0	1	1	0
408	0	25	0	0	0	1	1	1	1	0	1	1	0	1	1	1	0
409	0	27	0	0	1	1	1	1	1	0	1	0	0	1	1	1	0
410	0	26	0	0	0	0	1	1	1	1	1	0	1	1	1	1	0
411	0	28	0	0	0	1	1	1	1	1	1	1	1	1	0	1	0
412	0	28	0	0	0	1	1	1	1	0	1	1	1	1	0	1	0
413	0	36	0	0	0	1	1	1	1	0	0	1	0	1	0	1	0
414	0	20	0	0	0	1	1	1	1	0	1	1	0	1	0	1	0
415	0	36	0	0	1	1	1	1	1	0	0	1	1	1	0	1	0
416	0	26	0	0	0	1	1	1	1	0	1	1	0	1	0	1	0
417	0	29	0	0	0	0	1	1	1	0	1	1	0	1	0	1	0
418	0	31	0	0	0	1	1	1	1	0	1	0	1	1	0	1	0
419	0	29	0	0	0	0	1	1	1	1	1	1	1	1	0	1	0
420	0	24	0	0	0	1	1	1	1	0	1	1	1	1	0	1	0
421	0	23	0	0	0	0	1	1	1	0	1	1	0	1	0	1	0
422	0	37	0	0	0	1	1	1	1	0	1	1	0	1	0	1	0
423	0	23	0	0	0	1	1	1	1	0	1	1	0	1	0	1	0
424	0	29	0	0	0	1	1	1	1	1	0	1	0	1	0	1	0
425	0	43	0	0	0	1	1	1	1	0	1	0	0	1	0	1	0
426	0	32	0	0	0	1	1	1	1	0	1	1	1	1	0	1	0
427	0	25	0	0	0	1	1	1	1	1	1	1	1	1	0	1	0
428	0	28	0	0	1	1	1	1	1	0	1	1	0	1	0	1	0
429	0	22	0	0	0	1	1	1	1	1	1	1	0	1	0	1	0
430	0	26	0	0	0	1	1	1	1	0	1	0	1	1	0	1	0
431	0	35	0	0	0	1	1	1	1	0	1	0	1	1	0	1	0
432	0	24	0	0	0	1	1	1	0	0	1	0	0	1	1	1	0
433	0	30	0	0	0	1	1	1	1	0	1	0	1	1	0	1	0
434	0	34	0	0	0	1	1	1	1	0	1	0	1	1	0	1	0
435	0	38	0	0	0	0	1	1	1	0	1	1	1	1	1	1	0
436	0	32	0	0	0	0	1	1	1	0	1	1	1	1	1	1	0
437	0	29	0	1	1	1	1	1	0	0	1	1	1	1	1	1	0
438	0	27	0	1	1	1	1	1	0	0	0	1	0	1	1	1	0
439	0	17	0	0	0	0	1	1	1	0	0	1	0	0	1	1	0
440	0	30	0	0	0	0	1	1	1	0	1	0	0	1	1	1	0
441	0	38	0	0	0	1	1	1	1	1	1	0	1	1	1	1	0
442	0	27	0	0	0	1	1	1	0	0	1	0	0	1	1	1	0
443	0	23	0	1	0	0	1	1	1	1	1	0	1	0	1	1	0
444	0	33	0	1	0	1	1	1	1	1	1	0	1	1	1	1	0
445	0	29	0	1	0	0	1	1	1	0	1	1	0	1	1	1	0
446	0	29	0	0	0	0	1	1	1	0	1	1	1	1	0	1	0
447	0	31	0	0	0	0	1	1	0	0	1	0	0	1	1	1	0
448	0	30	0	0	0	0	1	1	1	0	1	0	0	1	1	1	0
449	0	27	0	0	0	0	1	1	1	0	0	1	0	1	1	1	0
450	0	33	0	0	1	1	1	1	1	0	1	1	1	1	1	1	0
451	0	30	0	0	0	0	1	1	1	0	0	0	1	1	1	0	0
452	0	24	0	0	0	1	1	1	0	0	1	0	0	1	1	1	0
453	0	32	0	0	1	1	1	1	1	0	1	1	0	1	1	1	0
454	0	31	0	0	0	1	1	1	0	0	0	0	1	1	1	0	0
455	0	35	0	0	1	1	1	1	0	0	0	1	0	1	1	1	0
456	0	21	0	0	0	0	1	1	1	1	1	1	1	1	0	1	0
457	0	27	0	0	1	1	1	1	1	0	0	1	0	1	0	1	0
458	0	29	0	0	0	0	1	1	1	0	1	0	1	1	1	1	0
459	0	28	0	0	0	0	1	1	1	0	1	1	0	1	0	0	0
460	0	34	0	0	0	0	1	1	1	0	1	1	0	1	0	1	0
461	0	17	0	0	0	0	1	1	1	1	1	1	0	0	0	1	0
462	0	25	0	0	0	0	1	1	1	0	1	1	1	1	0	1	0
463	0	31	0	0	0	0	1	1	1	0	1	1	1	1	0	1	0
464	0	20	0	0	0	0	1	1	1	1	1	1	0	1	0	1	0
465	0	36	0	0	0	0	1	1	1	0	1	1	1	1	0	1	0
466	0	22	0	0	0	0	1	1	1	0	1	1	0	1	0	1	0
467	0	38	0	0	0	1	1	1	1	0	1	1	0	1	1	1	0
468	0	34	0	0	0	0	1	1	1	0	1	0	1	1	0	1	0
469	0	31	0	0	0	0	1	1	1	0	1	0	0	1	1	1	0
470	0	31	0	0	0	0	1	1	1	0	1	0	1	1	0	1	0
471	0	23	0	0	0	0	1	1	0	1	0	1	1	0	1	0	0
472	0	27	0	0	0	1	1	1	0	0	0	0	0	1	1	1	0
473	0	33	0	0	0	1	1	1	1	0	1	1	1	0	1	1	0
474	0	35	0	0	0	0	1	1	1	0	0	1	0	1	1	1	0
475	0	20	0	0	0	0	1	1	0	1	1	1	0	1	1	1	0
476	0	19	0	0	0	1	1	1	1	1	1	1	0	1	1	1	0
477	0	25	0	1	0	0	1	1	1	1	1	0	1	1	1	1	0
478	0	25	0	0	1	1	1	1	1	0	0	0	0	1	1	1	0
479	0	32	0	0	0	0	1	1	0	1	1	1	1	1	1	1	0
480	0	21	0	0	0	0	1	1	1	1	0	1	1	1	0	1	0
481	0	35	0	0	0	0	1	1	0	0	0	0	1	1	1	0	0
482	0	22	0	0	0	0	1	1	1	0	1	1	0	0	1	1	0
483	0	24	0	0	0	0	1	1	0	1	1	1	0	0	1	1	0
484	0	18	0	0	0	0	1	1	1	1	1	1	1	0	1	1	0
485	0	32	0	0	0	1	1	1	1	0	1	1	1	1	1	1	0
486	0	40	0	0	1	0	1	1	1	0	1	1	1	1	1	1	0
487	0	18	0	0	0	0	1	1	1	1	1	1	1	0	1	1	0
488	0	35	0	0	0	0	1	1	0	0	1	0	0	1	1	1	0
489	0	24	0	0	0	1	1	1	0	0	0	0	1	1	1	0	0
490	0	35	0	0	0	0	1	1	0	1	1	1	1	0	1	0	0
491	0	27	0	0	0	0	1	1	1	0	1	0	1	1	1	1	0
492	0	23	0	0	0	0	1	1	1	1	0	1	0	0	1	1	0
493	0	24	0	0	0	0	1	1	1	1	0	0	1	0	1	1	0
494	0	38	0	0	0	0	1	1	1	0	1	1	0	0	1	1	0
495	0	22	0	0	0	0	1	1	1	1	1	0	0	1	1	1	0
496	0	24	0	0	0	1	1	1	0	0	1	0	1	1	1	0	0
497	0	29	0	0	0	0	1	1	1	0	1	1	0	1	1	1	0
498	0	30	0	0	0	0	1	1	0	1	0	1	0	1	1	1	0
499	0	24	0	0	0	0	1	1	0	1	0	1	1	1	1	1	0
500	0	31	0	0	0	1	1	1	1	0	1	1	1	1	1	1	0
501	0	19	0	0	0	1	1	1	1	0	1	1	0	1	1	1	0
502	0	19	0	0	0	0	1	1	1	1	1	1	1	0	1	1	0
503	0	25	0	0	0	0	1	1	0	1	1	1	1	1	1	1	0
504	0	33	0	0	0	0	1	1	1	0	0	1	1	0	1	1	0
505	0	37	0	0	0	0	1	1	1	0	1	1	1	0	1	1	0
506	0	44	0	0	1	0	1	1	1	0	1	0	0	0	1	1	0
507	0	27	0	0	0	0	1	1	1	0	1	0	0	0	1	1	0
508	0	21	0	0	0	0	1	1	1	1	0	1	0	0	1	1	0
509	0	28	0	0	0	0	1	1	1	0	1	0	0	1	1	1	0
510	0	34	0	0	0	0	1	1	1	0	1	0	1	0	1	1	0
511	0	31	0	0	0	0	1	1	1	0	0	0	0	1	1	1	0
512	0	26	0	0	0	1	1	1	0	0	1	0	0	1	1	1	0
513	0	28	0	0	0	0	1	1	1	0	1	0	1	1	1	1	0
514	0	39	0	0	0	0	1	1	1	0	1	1	0	1	1	1	0
515	0	19	0	0	0	0	1	1	1	0	1	1	1	0	1	1	0
516	0	27	0	0	0	0	1	1	0	1	1	1	0	0	1	1	0
517	0	31	0	0	0	0	1	1	1	0	1	0	1	1	1	1	0
518	0	26	0	0	0	0	1	1	1	0	1	0	0	1	1	1	0
519	0	22	0	0	0	1	1	1	1	0	1	1	0	0	1	1	0
520	0	26	0	0	0	0	1	1	0	1	1	1	1	0	1	0	0
521	0	26	0	0	1	0	1	1	1	1	1	0	1	0	1	1	0
522	0	33	0	0	0	0	1	1	0	0	0	0	1	1	1	0	0
523	0	18	0	0	0	0	1	1	1	0	1	1	0	1	1	1	0
524	0	27	0	0	1	0	1	1	1	1	0	1	0	0	1	1	0
525	0	28	0	0	0	0	1	1	1	0	1	1	0	0	1	1	0
526	0	40	0	0	0	0	1	1	1	0	1	0	0	1	1	1	0
527	0	33	0	0	0	0	1	1	1	0	1	1	0	1	1	1	0
528	0	27	0	0	1	0	1	1	1	0	1	0	1	1	1	1	0
529	0	27	0	0	0	0	1	1	1	0	0	1	1	1	1	1	0
530	0	27	0	0	0	0	1	1	1	1	1	0	0	1	1	1	0
531	0	30	0	0	0	0	1	1	1	0	1	0	0	1	1	1	0
532	0	28	0	0	0	0	1	1	1	0	1	0	0	0	1	1	0
533	0	31	0	0	0	0	1	1	1	0	1	0	1	1	1	1	0
534	0	25	0	0	0	0	1	1	1	0	1	0	1	1	1	1	0
535	0	35	0	0	0	0	1	1	1	0	1	0	0	0	1	1	0
536	0	25	0	0	0	0	1	1	0	1	1	1	1	0	1	0	0
537	0	26	0	0	1	0	1	1	1	0	1	0	1	0	1	1	0
538	0	23	0	0	0	0	1	1	1	1	1	1	0	0	1	1	0
539	0	41	0	0	1	1	1	1	1	0	1	0	0	0	1	1	0
540	0	32	0	0	1	0	1	1	1	0	1	0	1	1	1	1	0
541	0	33	0	0	1	0	1	1	1	0	1	0	1	1	1	1	0
542	0	33	0	0	0	0	1	1	0	0	1	0	1	1	1	1	0
543	0	25	0	0	0	0	1	1	1	1	1	1	0	0	1	1	0
544	0	19	0	0	0	0	1	1	0	1	1	1	0	1	1	1	0
545	0	29	0	0	1	0	1	1	1	0	1	0	0	1	0	1	0
546	0	38	0	0	0	0	1	1	1	1	1	1	1	0	0	1	0
547	0	26	0	0	0	0	1	1	1	1	1	1	1	0	0	1	0
548	0	28	0	0	0	0	1	1	1	0	1	1	0	1	0	1	0
549	0	19	0	0	0	0	1	1	1	1	1	1	0	1	0	1	0
550	0	32	0	0	0	0	1	1	1	0	0	1	0	0	0	1	0
551	0	32	0	0	0	0	1	1	1	0	0	1	0	1	0	1	0
552	0	32	0	0	1	0	1	1	1	0	1	1	0	0	0	1	0
553	0	29	0	0	1	0	1	1	1	0	1	0	0	0	0	1	0
561	0	28	0	0	0	1	1	1	1	1	1	1	0	1	1	1	0
562	0	24	1	1	1	1	1	1	1	1	1	1	0	1	0	1	0
563	0	31	0	1	0	1	1	1	1	0	0	0	0	1	0	1	0
565	0	30	0	1	0	1	1	1	1	0	1	1	1	1	0	1	0
566	0	26	0	1	1	1	1	1	1	1	1	1	1	1	0	1	0
568	0	28	0	1	1	1	1	1	1	1	1	0	1	1	0	1	0
570	0	22	0	1	0	1	1	1	1	1	1	1	1	1	1	1	0
574	0	33	0	0	1	1	1	1	1	0	1	0	1	1	1	1	0
582	0	27	0	1	1	1	1	1	1	1	0	1	0	1	0	1	0
583	0	27	0	1	0	1	1	1	0	0	1	0	0	1	1	1	0
862	0	42	0	1	1	1	1	1	1	0	1	0	0	1	1	1	0
873	0	30	0	0	1	1	1	1	1	1	1	1	1	1	0	1	0
874	0	38	0	1	0	1	1	1	1	0	1	1	1	1	1	0	0
875	0	34	0	1	0	1	1	1	1	0	1	1	0	1	0	1	0
876	0	32	0	0	0	0	1	1	1	0	0	1	1	0	1	0	0
877	0	34	0	0	0	1	1	1	1	0	0	1	0	1	0	1	0
878	0	21	0	0	0	1	1	1	1	0	0	1	0	0	1	1	0
879	0	36	0	0	1	1	1	1	1	0	1	0	0	1	1	1	0
880	0	41	0	0	0	1	1	1	1	0	1	1	1	1	1	1	0
881	0	22	0	0	0	0	1	1	1	0	1	1	0	1	1	1	0
882	0	27	0	0	0	0	1	1	1	1	0	0	1	1	0	1	0
883	0	24	0	0	0	0	1	1	1	1	1	1	1	1	1	1	0
884	0	29	0	0	0	1	1	1	1	0	1	1	1	1	0	0	0
885	0	30	0	1	0	0	1	1	1	0	1	0	1	1	1	0	0
886	0	35	0	0	0	0	1	1	1	0	0	1	1	1	1	0	0
887	0	28	0	1	0	1	1	1	1	1	1	1	1	1	1	0	0
888	0	33	0	1	1	1	1	1	1	1	1	1	1	1	1	0	0
889	0	36	0	0	0	0	1	1	1	0	1	1	1	1	1	1	0
890	0	19	0	0	0	0	1	1	1	1	0	1	1	1	1	0	0
891	0	29	0	0	0	0	1	1	1	0	1	1	1	1	1	0	0
892	0	35	0	0	0	0	1	1	1	0	0	0	1	1	1	0	0
893	0	28	0	0	0	0	1	1	1	0	1	1	1	1	1	1	0
894	0	27	0	0	0	0	1	1	1	0	1	1	1	1	1	0	0
895	0	24	0	0	0	1	1	1	1	0	1	1	1	1	1	0	0
896	0	31	0	0	0	1	1	1	1	0	1	1	0	1	1	1	0
897	0	27	0	0	0	1	1	1	1	0	1	1	1	0	1	0	0
898	0	37	0	0	0	1	1	1	1	0	1	1	1	1	1	1	0
899	0	31	0	1	0	1	1	1	1	0	1	1	1	1	1	0	0
900	0	31	0	0	0	0	1	1	1	1	1	1	1	1	1	0	0
902	0	28	0	1	1	1	1	1	1	0	1	1	1	1	1	0	0
903	0	26	0	1	1	1	1	1	1	0	1	1	1	1	1	0	0
904	0	23	0	1	0	0	1	1	1	0	1	1	1	1	1	1	0
905	0	47	0	0	0	1	1	1	1	0	1	0	1	1	1	1	0
906	0	37	0	0	0	1	1	1	1	0	1	1	1	1	0	1	0
907	0	29	0	0	0	0	1	1	1	0	1	0	0	1	0	1	0
908	0	31	0	1	0	1	1	1	1	0	1	1	1	1	1	1	0
909	0	30	0	0	0	1	1	1	1	0	0	1	1	1	1	0	0
910	0	34	0	1	1	1	1	1	1	0	1	0	1	1	1	1	0
911	0	35	0	0	0	0	1	1	1	0	1	1	1	1	0	1	0
912	0	35	0	0	0	0	1	1	1	0	0	1	1	1	1	0	0
914	0	35	0	0	0	1	1	1	1	0	1	1	1	1	1	1	0
915	0	30	0	1	1	1	1	1	1	0	1	1	1	1	1	0	0
916	0	25	0	1	1	1	1	1	1	0	1	1	1	1	1	1	0
917	0	29	0	1	1	1	1	1	1	1	1	1	1	1	1	0	0
918	0	35	0	1	1	1	1	1	1	0	0	1	1	1	0	0	0
919	0	34	0	0	1	1	1	1	1	0	1	1	1	1	1	1	0
920	0	34	0	0	0	1	1	1	1	0	1	1	1	1	1	1	0
921	0	27	0	0	0	1	1	1	1	1	0	1	1	1	1	0	0
922	0	24	0	1	1	1	1	1	0	0	1	1	1	0	0	0	0
923	0	30	0	0	0	0	1	1	1	1	0	0	1	1	1	1	0
924	0	24	0	1	1	1	1	1	0	1	1	1	1	0	0	1	0
925	0	27	0	0	0	0	1	1	1	0	0	1	1	1	1	0	0
926	0	29	0	1	1	1	1	0	1	1	1	1	1	1	1	0	0
927	0	28	0	0	0	1	1	1	1	0	0	1	1	1	1	0	0
928	0	31	0	1	1	1	1	1	0	0	1	1	1	1	1	0	0
930	0	30	0	1	0	0	1	1	0	1	1	0	1	1	1	0	0
931	0	33	0	0	0	0	1	1	1	0	0	1	1	0	1	0	0
932	0	37	0	0	0	1	1	1	1	0	1	1	1	1	0	1	0
933	0	27	0	0	0	1	1	1	1	1	1	1	0	0	0	1	0
934	0	31	0	0	0	0	1	1	1	0	1	1	1	1	1	0	0
935	0	34	0	1	1	1	1	1	1	0	1	1	0	1	0	1	0
936	0	33	0	0	0	1	1	1	1	0	1	1	1	1	1	1	0
937	0	26	0	1	0	1	1	1	1	1	1	1	1	0	1	0	0
938	0	24	0	0	0	0	1	1	1	1	1	1	1	1	1	0	0
939	0	25	0	0	1	1	1	1	1	1	0	1	1	1	1	0	0
940	0	27	0	0	0	1	1	1	1	0	1	1	1	1	1	1	0
941	0	30	0	1	1	1	1	1	0	1	1	1	1	1	1	0	0
942	0	34	0	1	1	1	1	1	1	0	1	1	1	1	0	0	0
943	0	27	0	0	0	0	1	1	0	1	1	1	1	0	1	1	0
944	0	32	0	1	1	1	1	1	1	0	1	1	1	1	1	0	0
945	0	36	0	1	1	1	1	1	0	1	1	1	0	1	1	1	0
946	0	28	0	0	0	1	1	1	0	0	1	1	1	1	1	0	0
947	0	26	0	0	0	1	1	0	1	1	1	1	1	1	1	0	0
948	0	34	0	1	0	0	0	0	0	0	0	0	1	1	1	0	0
949	0	22	0	0	0	1	0	0	1	1	0	1	1	1	0	1	0
303	1	33	0	1	0	1	1	1	1	0	1	0	0	1	1	1	0
304	1	36	0	1	1	1	1	1	1	1	0	0	0	1	1	1	0
305	1	26	1	1	1	1	1	1	1	1	0	1	1	1	1	0	0
307	1	31	0	0	1	1	1	1	1	0	1	1	0	1	1	0	0
309	1	28	0	1	0	0	1	1	1	0	1	0	1	1	1	1	0
310	1	43	0	0	1	1	1	1	1	0	1	0	0	1	1	1	0
312	1	29	0	1	1	1	1	1	1	0	1	1	1	1	1	1	0
314	1	35	0	0	0	1	1	1	0	0	0	0	0	1	0	1	0
315	1	21	0	0	0	0	1	1	1	1	1	1	0	1	1	0	0
317	1	35	0	0	0	1	1	1	1	0	1	1	1	1	1	1	0
318	1	22	0	0	0	1	1	1	1	0	0	1	0	1	1	1	0
320	1	20	0	0	0	1	1	1	1	1	0	1	1	1	1	0	0
321	1	39	0	0	0	1	1	1	1	0	1	0	1	1	1	1	0
322	1	28	0	0	0	1	1	1	1	0	1	0	1	1	1	1	0
324	1	24	0	1	1	1	1	1	1	1	1	1	1	1	1	1	0
325	1	26	0	1	1	1	1	1	1	0	1	0	0	0	1	1	0
326	1	27	1	1	1	1	1	1	1	0	1	1	1	1	1	1	0
554	1	33	1	1	1	1	1	1	1	1	1	0	1	1	1	1	0
555	1	22	1	0	1	1	1	1	1	1	1	0	1	0	1	1	0
556	1	27	1	0	0	1	1	1	0	1	0	0	1	0	0	0	0
557	1	22	1	1	0	1	1	1	1	0	1	1	0	1	1	0	0
558	1	30	1	1	1	1	1	1	1	1	1	1	1	0	0	0	0
559	1	20	1	0	0	1	1	1	0	1	0	0	1	1	0	1	0
564	1	20	1	0	1	0	0	0	1	0	1	0	0	0	0	0	1
569	1	22	1	0	0	1	1	1	0	0	1	1	1	0	1	0	1
571	1	28	1	1	0	1	1	1	0	1	1	0	1	1	1	1	0
572	1	28	1	1	1	1	1	1	0	1	1	1	1	1	1	1	0
573	1	27	1	0	0	1	1	1	1	0	0	1	0	0	1	1	0
575	1	28	0	1	1	0	1	1	1	0	1	0	0	0	1	1	1
576	1	29	0	1	0	1	1	1	1	1	1	1	1	1	1	1	0
577	1	20	0	0	0	0	1	1	1	0	1	1	1	0	0	1	0
579	1	25	1	1	0	1	1	1	1	1	1	1	0	1	1	1	1
580	1	38	1	0	0	0	1	1	1	1	0	0	0	0	1	0	0
581	1	32	0	1	0	1	1	1	0	0	1	0	0	1	0	1	0
584	1	31	0	1	0	1	1	1	1	1	1	0	0	1	1	1	0
585	1	22	0	0	1	1	0	0	1	0	1	1	1	0	1	1	0
586	1	29	1	1	1	1	1	1	1	0	1	1	0	1	1	0	0
587	1	26	1	1	0	1	1	1	0	0	1	0	0	1	1	0	0
588	1	28	1	1	1	1	1	1	1	0	1	0	0	0	1	1	0
589	1	32	1	1	1	1	1	0	1	1	1	1	1	1	1	1	0
590	1	39	1	1	0	1	1	1	0	1	1	0	0	1	0	1	0
591	1	33	1	1	0	1	1	1	1	1	1	0	1	0	1	1	1
593	1	29	1	0	0	1	1	1	1	1	1	0	0	0	0	1	1
594	1	28	1	0	0	1	1	1	1	1	1	0	0	0	1	0	1
595	1	28	1	0	0	0	1	1	1	1	1	0	0	0	0	1	1
596	1	31	1	1	0	1	0	0	0	0	1	1	0	1	1	0	0
597	1	24	1	0	1	1	1	1	1	0	1	0	0	1	1	0	0
598	1	39	1	0	0	1	1	1	1	1	1	0	1	0	1	1	0
599	1	31	1	0	0	1	1	1	1	1	1	0	1	0	0	0	0
600	1	28	1	1	1	1	1	1	1	1	1	0	0	0	0	0	0
601	1	27	1	1	1	1	1	1	1	1	1	0	0	0	1	0	0
602	1	32	1	0	0	1	1	1	1	1	0	1	0	0	0	0	0
603	1	28	1	1	0	1	1	1	1	0	1	0	0	1	1	1	1
604	1	24	1	0	0	1	1	1	1	1	1	1	0	0	1	0	0
605	1	29	1	0	1	1	1	1	1	0	0	1	1	1	0	0	0
606	1	39	1	1	0	1	1	1	0	1	0	0	0	0	0	0	1
607	1	30	1	1	1	1	1	1	1	1	1	1	1	0	1	0	0
608	1	35	1	1	0	1	1	1	0	1	1	0	0	0	0	0	1
609	1	33	1	1	0	1	1	1	1	0	0	0	0	1	1	1	1
610	1	24	1	1	1	1	1	1	1	1	1	0	0	0	1	0	0
611	1	25	1	1	1	1	1	1	1	1	1	0	1	0	1	0	0
612	1	21	1	0	1	1	1	1	1	0	1	0	1	1	1	0	0
613	1	43	1	0	0	1	1	1	0	1	1	1	1	0	1	0	0
614	1	33	1	1	1	1	1	1	1	0	1	0	1	1	1	0	0
615	1	45	0	0	0	1	1	1	0	0	1	1	1	1	1	0	0
616	1	28	1	1	0	1	1	1	1	1	1	1	1	0	0	0	0
617	1	30	1	1	0	1	1	1	1	1	1	1	1	1	0	1	0
618	1	32	1	1	1	1	1	1	0	1	1	1	0	0	1	1	1
619	1	30	1	1	0	1	1	0	1	1	1	1	1	1	1	0	0
620	1	32	1	0	0	0	0	0	0	1	1	1	0	1	1	0	0
621	1	41	1	1	0	1	1	1	0	0	1	0	0	1	1	0	0
622	1	32	1	0	0	1	1	1	1	0	1	1	0	1	1	0	0
623	1	38	1	1	0	1	1	1	0	0	1	1	0	1	1	0	0
624	1	34	1	1	1	1	1	1	1	1	1	1	1	0	0	0	0
625	1	24	1	1	0	1	1	1	1	0	1	1	1	1	0	0	0
626	1	30	1	0	0	1	1	1	1	0	1	0	0	1	0	0	0
627	1	32	1	1	0	1	1	1	1	1	1	0	1	1	0	0	0
628	1	28	1	1	1	1	1	1	1	0	1	1	1	1	1	0	0
629	1	32	1	1	1	1	1	1	1	0	1	0	0	0	1	1	0
630	1	32	1	1	0	1	0	0	0	1	1	0	1	0	1	1	0
631	1	20	1	1	0	1	1	1	1	1	1	1	1	1	0	1	0
632	1	30	1	1	1	1	1	1	1	0	1	0	1	1	1	1	0
633	1	32	0	1	0	1	1	1	0	0	1	1	0	0	1	1	0
634	1	24	1	0	0	1	1	1	0	1	0	0	0	1	0	1	0
635	1	27	1	1	1	1	1	1	1	1	1	1	1	1	0	1	0
636	1	24	1	1	0	0	1	1	1	0	1	0	0	0	1	1	0
637	1	28	1	1	0	1	1	1	1	0	1	1	0	1	0	0	0
638	1	19	1	0	0	1	1	1	1	1	1	1	0	0	1	1	0
639	1	29	1	0	0	1	1	1	1	0	1	0	0	0	1	1	0
640	1	29	1	1	1	1	1	1	1	1	1	1	1	1	1	1	0
641	1	32	1	0	0	0	1	1	1	0	0	0	0	0	1	1	0
642	1	41	1	1	0	1	1	1	0	0	0	0	1	1	0	1	0
643	1	39	1	1	0	1	1	1	1	1	0	1	0	0	1	1	0
644	1	20	1	0	0	1	1	1	0	1	0	1	0	0	1	1	1
645	1	27	1	0	1	1	1	1	1	1	0	1	0	0	1	1	0
646	1	26	1	1	1	1	1	1	1	1	1	0	1	1	1	1	0
647	1	25	1	1	1	1	1	1	1	0	1	1	1	1	1	1	0
648	1	33	1	1	0	1	1	1	0	1	1	1	1	0	1	1	1
649	1	26	1	1	1	1	1	1	1	1	1	0	1	0	1	1	0
650	1	37	1	0	0	1	1	1	1	1	1	1	1	0	1	1	0
651	1	26	1	0	1	1	1	1	1	1	1	0	1	0	1	1	0
652	1	24	1	0	1	0	1	1	1	1	0	1	1	0	0	1	0
653	1	26	1	1	0	1	1	1	1	1	0	1	1	1	1	1	0
654	1	24	1	1	0	1	1	1	0	1	1	1	1	0	1	1	1
655	1	32	1	1	0	1	1	1	0	0	0	0	1	1	0	1	0
656	1	25	1	1	0	1	1	1	0	1	1	1	1	1	1	1	0
657	1	27	1	0	0	1	1	0	0	1	1	1	1	1	1	1	0
658	1	26	1	0	0	1	1	1	1	0	1	0	1	1	1	1	0
659	1	23	1	1	0	1	1	1	1	1	1	1	0	1	1	1	0
660	1	27	1	1	1	1	1	1	1	1	1	1	1	1	0	1	0
661	1	26	1	1	0	1	1	1	1	1	1	1	0	0	0	1	0
662	1	25	1	0	1	1	1	1	1	0	1	0	1	1	1	1	0
663	1	30	1	1	0	1	1	1	1	1	1	0	0	0	1	1	0
664	1	29	1	0	0	1	1	1	0	0	1	0	1	1	0	1	0
665	1	46	1	1	1	1	1	1	1	0	1	1	1	1	1	0	0
666	1	22	1	0	1	1	1	1	0	1	0	0	1	1	1	1	0
667	1	28	1	0	0	1	1	1	0	1	0	1	0	0	1	1	1
668	1	25	1	0	1	1	1	1	1	1	1	0	1	0	1	1	0
669	1	22	1	0	1	1	1	0	1	0	1	1	1	1	1	1	0
670	1	21	1	1	1	1	1	1	1	1	1	1	1	0	0	1	0
671	1	34	1	1	1	1	1	1	1	0	1	0	0	0	1	1	0
672	1	26	1	1	0	1	1	1	1	0	1	0	1	1	1	1	0
673	1	26	1	1	1	1	1	0	0	1	1	0	0	0	1	1	0
674	1	27	1	1	0	1	1	1	1	1	1	0	0	0	1	1	0
675	1	23	1	1	0	1	1	1	1	0	1	1	0	1	1	1	0
676	1	22	1	0	0	0	1	1	1	1	1	1	1	1	1	1	0
677	1	35	1	0	0	1	1	1	0	0	0	1	0	0	1	1	0
678	1	23	1	1	1	1	1	1	1	1	1	1	0	0	0	1	0
679	1	26	1	0	0	1	1	1	1	1	1	0	0	0	1	1	0
680	1	27	1	1	1	1	1	1	0	1	1	1	1	1	1	1	0
681	1	25	1	1	0	1	1	1	1	1	1	1	0	0	0	1	0
682	1	28	1	1	0	1	1	1	1	1	1	1	1	0	0	1	0
683	1	20	1	0	0	1	1	1	0	0	0	0	1	1	0	1	0
684	1	22	1	1	0	1	1	1	1	1	1	1	1	1	1	1	0
685	1	28	1	1	1	1	1	1	1	1	1	0	0	0	1	1	0
686	1	26	1	0	1	0	1	1	1	0	1	0	0	1	1	1	0
687	1	23	1	0	0	1	1	1	1	0	1	0	0	0	1	1	0
688	1	22	1	1	0	1	1	1	1	1	1	0	0	0	1	1	0
689	1	32	1	1	0	1	1	1	0	1	0	1	0	0	1	1	1
690	1	24	1	1	0	1	1	1	1	1	1	0	1	1	1	1	0
691	1	29	1	1	0	1	1	1	1	0	1	1	1	1	0	0	0
692	1	17	1	1	0	1	1	1	1	1	1	1	0	0	1	1	0
693	1	27	1	1	1	1	1	1	0	1	0	1	1	1	1	1	0
694	1	23	1	1	0	1	1	0	0	0	1	0	0	0	1	1	0
695	1	26	1	0	1	1	1	1	1	1	1	1	1	0	0	1	0
696	1	29	1	1	1	1	1	1	1	0	1	0	0	0	1	1	1
697	1	40	1	0	0	1	1	1	1	0	1	0	0	1	1	1	0
698	1	27	1	0	0	0	1	1	1	0	1	0	0	1	1	1	0
699	1	35	0	1	0	1	1	1	1	0	1	0	1	0	1	0	1
700	1	30	1	1	1	1	1	1	1	1	1	1	1	1	1	1	0
701	1	32	1	0	0	1	0	1	1	0	1	1	0	1	1	0	0
702	1	21	1	0	0	0	1	1	0	1	0	1	0	0	1	1	1
703	1	30	1	1	1	1	1	0	1	1	1	1	1	0	0	1	0
704	1	23	1	1	1	1	1	1	1	1	1	1	1	1	1	1	0
705	1	30	1	1	1	1	1	1	1	0	1	0	1	1	1	1	0
706	1	25	1	0	0	1	1	1	1	1	1	0	0	1	1	1	0
707	1	26	1	0	0	1	1	0	1	0	1	1	1	1	0	0	0
708	1	45	1	0	0	1	1	1	1	0	1	0	1	1	1	1	0
709	1	22	1	1	1	1	1	1	1	1	1	0	1	0	1	1	0
710	1	33	1	1	1	1	1	0	1	0	1	1	1	1	1	0	0
711	1	30	1	1	1	1	1	1	1	0	0	0	0	0	1	1	0
712	1	24	1	1	1	1	1	1	1	1	1	0	1	1	1	1	0
713	1	37	1	0	1	1	1	1	1	0	0	1	1	1	0	1	0
714	1	23	1	1	0	1	1	0	0	1	1	0	0	0	1	1	0
715	1	23	1	1	0	1	1	1	1	0	0	0	0	0	1	1	0
716	1	21	1	0	0	1	1	1	1	1	1	1	0	0	1	1	0
717	1	31	1	1	0	1	1	1	0	0	0	1	0	0	1	1	0
718	1	27	1	1	1	1	1	1	1	1	0	0	1	1	1	1	0
719	1	23	1	0	0	0	1	0	1	1	1	1	0	0	1	1	0
720	1	26	1	1	0	1	1	1	1	1	0	0	1	1	1	1	0
721	1	31	1	0	0	1	1	1	0	0	1	0	0	1	1	0	0
722	1	26	1	1	1	1	1	0	0	1	1	1	0	0	1	1	1
723	1	23	1	0	0	1	1	0	1	0	1	1	1	1	1	1	0
724	1	24	1	1	0	1	1	1	1	0	0	1	1	1	1	1	0
725	1	26	1	1	1	1	1	1	0	1	0	1	0	0	1	1	1
726	1	33	1	1	1	1	1	1	1	0	1	0	0	0	1	1	0
727	1	29	1	0	0	0	1	1	1	0	1	0	1	1	1	1	0
728	1	27	1	0	0	1	1	1	1	0	0	1	1	1	1	1	0
729	1	20	1	1	0	1	1	1	1	1	1	0	1	0	1	1	0
730	1	26	1	1	0	1	1	1	1	1	1	1	1	1	1	1	0
731	1	31	1	1	1	1	1	1	1	0	1	1	1	1	1	0	0
732	1	37	1	1	0	1	1	1	1	1	1	0	0	0	0	1	0
733	1	29	1	1	1	1	1	1	1	0	1	0	1	1	1	1	0
734	1	24	1	1	1	1	1	1	1	1	1	1	1	0	0	1	0
735	1	20	1	0	0	1	1	1	1	1	0	1	1	1	0	1	0
736	1	31	1	1	1	1	1	1	1	0	0	1	0	1	1	1	1
737	1	22	1	0	0	1	1	1	1	1	1	1	1	0	0	0	0
738	1	37	1	0	0	1	1	1	1	0	1	1	1	1	1	0	0
739	1	33	1	0	0	1	1	1	1	1	0	1	1	0	1	0	0
740	1	26	1	1	0	1	1	1	1	1	1	1	1	1	1	1	0
741	1	29	1	0	1	1	1	1	1	1	0	1	1	0	0	1	0
742	1	29	1	1	1	1	1	1	1	1	1	0	1	1	1	1	0
743	1	24	1	1	1	1	1	1	1	1	0	0	0	0	1	1	0
744	1	35	1	1	0	1	1	1	1	0	1	0	1	1	1	1	0
745	1	24	1	1	1	1	1	1	1	1	0	0	1	1	1	1	0
746	1	27	1	1	0	1	1	1	1	1	1	1	0	0	1	1	0
747	1	39	0	0	1	1	1	1	1	0	1	0	0	1	0	1	0
748	1	29	1	0	0	1	1	1	1	0	1	1	1	1	1	0	0
749	1	30	1	0	0	1	1	1	1	0	1	0	0	0	0	1	0
750	1	34	1	1	1	1	1	1	1	0	1	1	1	1	0	0	0
751	1	27	1	1	1	1	1	1	1	0	1	1	1	1	0	0	0
752	1	30	1	0	0	1	1	1	1	0	0	0	1	1	1	1	0
753	1	25	1	0	1	0	1	1	1	1	1	0	0	0	1	1	0
754	1	26	1	1	1	1	1	1	1	1	1	0	1	1	1	1	0
755	1	24	1	1	1	1	1	1	1	1	0	1	0	1	1	1	1
756	1	32	1	0	0	1	1	1	1	1	1	1	1	0	0	0	0
757	1	26	1	1	1	1	1	1	1	0	1	1	0	1	0	0	0
758	1	28	1	1	1	1	1	1	1	1	0	0	1	1	1	1	0
759	1	24	1	0	0	0	1	1	1	0	0	0	0	0	1	1	0
760	1	28	1	1	1	1	1	1	1	0	0	1	0	0	1	1	0
761	1	35	1	1	1	1	1	1	1	1	1	1	1	0	0	1	0
762	1	23	1	0	1	1	1	1	1	1	0	1	1	0	0	1	0
763	1	26	1	0	0	1	1	1	1	0	1	0	1	1	1	1	0
764	1	31	1	0	0	1	1	1	1	0	0	1	0	0	1	1	0
765	1	29	1	0	1	1	1	1	1	1	0	1	1	0	0	1	0
766	1	28	1	1	0	1	1	1	1	0	1	1	1	1	1	0	0
767	1	25	1	1	1	1	1	1	0	1	0	1	1	1	1	1	0
768	1	23	1	0	0	1	1	1	1	1	1	0	0	0	1	1	0
769	1	29	1	0	1	1	1	0	1	1	1	1	1	0	0	0	0
770	1	27	1	1	1	1	1	1	1	1	1	1	0	1	1	1	0
771	1	20	1	1	0	1	1	1	1	1	1	1	1	1	1	1	0
772	1	40	1	1	1	1	1	1	1	1	1	0	0	0	1	1	0
773	1	37	1	1	1	1	1	1	0	1	1	1	1	0	1	1	1
774	1	34	1	0	1	1	1	0	1	1	1	1	1	0	0	0	0
775	1	21	1	0	0	1	1	1	1	0	1	0	0	0	0	1	0
776	1	28	1	1	1	1	1	1	1	1	0	0	0	0	1	1	0
777	1	31	1	1	1	1	1	1	1	0	1	0	1	1	1	1	0
778	1	32	1	1	0	1	1	1	0	0	1	1	1	0	1	1	0
779	1	29	1	1	1	1	1	1	1	1	1	1	1	1	0	1	0
780	1	26	1	0	0	1	1	1	1	1	1	0	0	0	0	1	1
781	1	27	1	1	1	1	1	1	1	1	1	0	0	0	1	1	0
782	1	28	1	1	1	1	1	1	1	1	0	0	1	1	1	1	1
783	1	26	1	1	1	1	1	1	1	1	1	0	0	0	1	1	0
784	1	25	1	1	1	1	1	1	1	1	1	1	1	0	1	0	0
785	1	35	1	1	1	1	1	1	1	0	0	0	1	1	1	1	1
786	1	28	1	1	1	1	1	1	1	1	1	0	0	0	1	1	0
787	1	31	1	0	0	1	1	1	0	0	1	0	0	1	1	0	0
788	1	27	1	0	0	1	1	1	1	0	0	0	1	0	1	0	1
789	1	27	1	1	0	1	1	1	1	1	1	0	1	0	1	1	0
790	1	24	1	0	0	0	0	0	0	1	1	1	0	0	1	0	0
791	1	36	1	0	0	1	0	0	0	0	0	0	0	1	0	1	0
792	1	25	0	1	1	1	1	0	0	1	1	0	0	0	1	1	0
793	1	31	1	1	0	0	1	1	1	0	1	1	1	0	1	1	0
794	1	27	1	1	1	1	1	1	1	1	1	1	1	0	1	1	1
795	1	28	1	1	1	1	1	1	0	1	1	1	1	1	1	1	0
796	1	30	1	1	0	1	1	1	1	0	1	0	1	0	1	0	1
797	1	25	1	1	1	1	1	1	0	1	1	1	1	1	1	1	0
798	1	27	1	0	0	0	1	1	1	1	1	1	0	0	1	0	0
799	1	31	1	1	0	1	1	0	0	1	1	1	1	1	1	1	0
800	1	31	1	1	0	1	1	1	0	1	1	1	1	0	1	1	0
801	1	36	1	1	1	1	1	1	1	0	1	0	1	0	1	1	1
802	1	28	1	0	0	1	1	1	0	1	1	0	1	1	1	1	0
803	1	28	1	0	0	1	1	1	0	1	1	0	0	0	0	0	1
804	1	24	1	1	1	1	1	1	1	1	1	0	0	0	1	1	0
805	1	26	1	0	0	0	1	0	0	0	1	1	0	0	1	1	1
806	1	27	1	1	1	1	1	1	1	1	1	1	1	1	0	1	0
807	1	30	1	1	0	1	1	1	0	1	1	1	0	1	1	0	0
808	1	28	1	1	1	1	1	1	1	1	1	1	1	1	0	1	0
809	1	30	1	1	1	1	1	1	1	0	1	0	0	0	0	1	0
810	1	30	1	1	1	1	1	1	1	0	1	0	0	0	0	1	0
811	1	27	1	1	0	1	1	1	1	1	0	1	0	0	0	1	0
812	1	26	1	1	1	1	1	1	1	1	0	1	1	1	0	1	0
813	1	28	1	1	1	1	1	1	1	1	0	1	0	0	0	1	0
814	1	24	1	1	1	1	1	1	1	1	1	0	1	1	1	1	0
815	1	27	1	1	1	1	1	1	1	1	1	1	0	0	0	1	0
816	1	25	1	1	1	1	1	1	1	1	1	0	1	1	1	1	0
817	1	26	1	1	0	1	1	1	0	1	1	1	1	1	1	1	0
818	1	28	1	1	1	1	1	1	1	1	1	0	0	0	0	1	0
819	1	28	1	1	1	1	1	1	1	1	1	0	0	0	0	1	0
820	1	21	1	1	1	1	1	1	0	1	1	1	1	1	1	1	0
821	1	26	1	1	1	1	1	1	0	1	1	1	1	1	1	1	0
822	1	28	1	1	1	1	1	1	1	1	1	1	1	0	1	0	0
823	1	28	1	1	0	1	1	1	1	1	1	1	0	0	0	1	0
824	1	32	1	1	1	1	1	1	1	0	0	0	1	0	0	1	1
825	1	24	1	1	1	1	1	1	1	1	1	1	1	0	0	1	0
826	1	23	1	1	1	1	1	1	1	1	1	1	0	1	1	1	1
827	1	27	1	1	1	1	1	1	1	1	1	1	0	0	0	1	0
828	1	22	1	1	1	1	1	1	1	1	1	1	0	0	0	1	0
829	1	29	1	1	0	1	0	1	1	1	0	0	1	1	1	1	0
830	1	26	1	1	1	1	1	1	1	1	1	1	0	0	0	1	0
831	1	23	1	1	1	1	1	0	0	1	1	0	0	0	1	1	0
832	1	24	1	1	1	1	1	1	1	1	1	1	1	1	0	1	0
833	1	22	1	1	0	1	1	1	1	1	1	0	1	1	1	1	0
834	1	27	1	1	1	1	1	1	1	1	1	0	0	0	0	1	0
835	1	24	1	1	1	1	1	0	0	1	1	0	0	0	1	1	0
836	1	27	1	1	1	1	1	1	1	1	1	0	1	1	1	1	0
837	1	26	1	1	0	1	1	1	1	1	0	0	0	0	0	1	0
838	1	23	1	1	1	1	1	1	1	1	1	1	1	1	0	1	0
839	1	24	1	1	1	1	1	1	1	1	1	0	1	1	1	1	0
840	1	28	1	1	1	1	1	1	1	1	0	0	1	1	0	1	1
841	1	27	1	1	1	1	1	1	1	0	1	1	0	0	0	1	0
842	1	24	1	1	0	1	1	1	1	1	1	0	1	1	1	1	0
843	1	26	1	1	1	1	1	0	0	1	1	0	0	0	1	1	0
844	1	27	1	1	1	1	1	1	1	1	0	0	0	0	0	1	1
845	1	21	1	1	1	1	1	1	1	1	1	1	0	1	1	1	1
846	1	28	1	1	1	1	1	1	1	1	1	0	0	0	0	1	0
847	1	25	1	1	1	1	1	1	1	1	1	1	0	1	1	1	1
848	1	24	1	1	1	1	1	1	1	1	1	1	1	1	0	1	0
849	1	26	1	1	1	1	1	1	1	1	1	1	1	1	0	1	0
850	1	31	1	1	0	1	1	1	1	0	0	1	0	0	0	1	0
851	1	27	1	1	1	1	1	1	1	1	1	1	1	1	0	1	0
852	1	29	1	1	1	1	1	1	1	1	1	0	0	0	0	1	0
853	1	26	1	1	1	1	1	1	1	1	1	1	0	0	0	1	0
854	1	25	1	1	0	1	1	0	0	1	1	0	0	0	1	1	0
855	1	27	1	1	1	1	1	1	1	1	1	0	1	1	1	1	0
856	1	30	1	1	0	1	1	1	0	1	1	1	0	1	1	0	0
857	1	28	1	1	0	0	1	1	1	1	1	0	1	0	1	1	0
858	1	24	1	1	0	1	1	1	0	1	1	1	1	1	1	1	0
859	1	27	1	1	0	1	1	1	1	0	1	1	0	0	1	1	0
860	1	27	1	1	0	1	1	1	1	1	1	0	1	1	1	1	0
861	1	29	1	0	1	1	1	1	1	0	0	1	0	0	1	1	0
863	1	26	1	0	1	1	1	1	1	0	1	0	0	0	1	1	0
864	1	28	1	1	1	1	1	1	1	1	1	0	0	0	1	1	1
865	1	29	1	1	1	1	1	1	1	1	1	1	1	1	1	1	0
866	1	26	1	0	0	1	1	1	0	1	1	1	0	1	1	0	0
867	1	29	1	1	0	1	1	1	1	0	1	0	1	1	1	1	1
868	1	32	1	1	0	1	1	1	0	1	0	1	0	0	1	1	1
869	1	26	1	1	0	1	1	1	1	0	1	1	1	0	1	1	0
870	1	28	1	0	0	1	1	1	0	1	1	1	0	0	1	0	1
871	1	27	1	1	1	1	1	1	0	1	0	1	1	1	1	0	0
872	1	23	1	0	0	0	1	1	1	1	1	1	0	0	0	1	0
901	1	25	0	1	1	1	1	1	0	1	0	1	0	1	1	1	0
950	1	28	1	0	0	1	0	0	0	1	0	1	1	1	1	0	0
951	1	34	0	0	1	1	1	1	1	1	1	1	0	1	1	1	0
952	1	37	0	1	1	1	1	1	1	0	0	1	0	1	0	1	0
953	1	27	1	1	1	1	1	1	1	0	0	0	1	1	0	0	0
954	1	32	0	1	1	1	1	1	1	1	1	0	0	1	0	0	0
955	1	29	0	0	1	0	1	1	0	1	1	1	1	1	1	1	0
956	1	44	0	1	1	1	1	1	1	1	1	1	0	1	1	1	0
957	1	30	0	1	0	1	1	1	1	1	1	0	1	1	0	1	0
958	1	36	0	0	1	1	1	1	0	1	0	1	0	1	1	1	0
959	1	22	0	0	1	0	1	1	1	0	1	1	0	1	1	0	0
960	1	36	0	0	1	1	1	1	1	1	1	0	1	1	1	1	0
961	1	23	0	0	1	1	1	1	1	1	0	0	0	1	1	1	0
962	1	21	0	0	1	1	1	1	1	0	0	0	1	1	1	0	0
963	1	40	0	0	1	1	1	1	0	1	1	1	1	1	1	1	0
964	1	29	0	0	1	1	1	1	0	1	1	1	1	1	1	1	0
965	1	25	0	1	1	1	1	1	1	0	1	0	1	1	0	1	0
966	1	27	0	1	1	1	1	1	1	1	1	1	0	0	0	1	0
967	1	28	1	1	0	1	1	1	1	1	1	0	1	1	0	1	0
968	1	34	1	1	1	1	1	1	0	0	1	1	1	1	1	1	0
969	1	23	1	1	1	1	1	1	0	0	1	1	1	0	1	1	0
970	1	28	1	0	1	1	1	1	0	0	0	1	1	0	1	0	0
971	1	23	1	1	0	1	1	1	1	1	1	0	0	1	0	0	0
972	1	31	1	1	1	1	1	1	1	0	1	0	1	0	1	0	0
973	1	21	1	0	1	1	1	1	0	0	0	1	1	1	1	1	0
974	1	21	1	1	1	0	0	0	1	1	0	1	0	0	1	0	1
975	1	23	1	0	1	1	1	1	0	1	1	0	1	0	1	0	1
976	1	29	1	0	1	1	1	1	0	0	1	1	1	1	1	1	0
977	1	29	1	1	1	1	1	1	0	0	1	0	1	1	0	1	0
978	1	28	1	0	1	1	1	1	1	1	0	0	0	0	1	1	0
979	1	29	0	1	1	0	1	1	1	1	1	1	0	0	0	1	1
980	1	30	0	1	0	1	1	1	1	0	1	0	1	1	0	1	0
981	1	21	0	0	1	0	1	1	1	1	1	0	1	0	1	1	0
982	1	26	1	1	0	1	1	1	1	0	1	0	0	1	0	1	1
983	1	39	1	0	1	0	1	1	1	0	0	1	0	0	1	0	0
984	1	33	0	0	1	1	1	1	0	1	1	1	0	1	1	1	0
985	1	32	0	0	1	1	1	1	1	0	1	1	0	1	1	1	0
986	1	23	0	1	1	1	0	0	1	1	1	0	1	0	0	1	0
987	1	30	1	1	0	1	1	1	1	1	1	0	0	1	0	0	0
988	1	27	1	0	1	1	1	1	0	1	1	1	0	1	1	0	0
989	1	29	1	1	1	1	1	1	1	1	1	1	0	0	0	1	0
990	1	33	1	1	1	1	1	0	1	0	1	0	1	1	0	1	0
991	1	40	1	0	1	1	1	1	0	0	1	1	0	1	1	1	0
992	1	30	1	0	1	1	1	1	1	0	1	1	0	0	1	1	1
993	1	29	1	0	1	1	1	1	1	0	1	1	0	0	1	0	1
994	1	29	1	0	1	0	1	1	1	0	0	1	0	0	1	1	1
995	1	32	1	1	0	1	0	0	0	1	1	0	0	1	1	0	0
996	1	25	1	1	1	1	1	1	1	1	1	1	0	1	0	0	0
997	1	40	1	0	1	1	1	1	1	0	1	1	1	0	1	1	0
998	1	32	1	0	1	1	1	1	1	0	1	1	1	0	1	0	0
999	1	29	1	1	1	1	1	1	1	0	1	1	0	0	1	0	0
1000	1	28	1	1	1	1	1	1	1	0	1	1	0	0	0	0	0
1001	1	33	1	0	1	1	1	1	1	0	0	0	0	0	1	0	0
1002	1	25	1	0	1	1	1	1	1	0	1	0	0	0	1	0	0
1003	1	30	1	1	1	1	1	1	1	1	0	0	1	1	1	0	0
1004	1	40	1	0	1	1	1	1	1	0	0	1	0	0	1	0	1
1005	1	31	1	1	1	1	1	1	1	0	1	0	1	0	0	0	0
1006	1	36	1	0	1	1	1	1	1	0	1	1	0	0	1	0	1
1007	1	25	1	1	1	1	1	1	1	0	1	1	0	0	0	0	0
1008	1	26	1	1	1	1	1	1	1	0	1	1	1	0	0	0	0
1009	1	22	1	1	1	1	1	1	1	1	1	1	1	1	0	0	0
1010	1	44	1	0	1	1	1	1	0	0	1	0	1	0	1	0	0
1011	1	34	1	1	1	1	1	1	1	1	1	1	1	1	0	0	0
1012	1	46	0	0	1	1	1	1	0	1	1	0	1	1	1	0	0
1013	1	29	1	1	0	1	1	1	1	0	1	0	1	0	1	0	0
1014	1	31	1	1	0	1	1	1	1	0	1	0	1	1	1	1	0
1015	1	33	1	1	1	1	1	1	0	0	1	0	0	0	0	1	1
1016	1	31	1	1	0	1	1	0	1	0	1	0	1	1	0	0	0
1017	1	33	1	0	1	0	0	0	0	0	1	1	0	1	1	0	0
1018	1	42	1	0	1	1	1	1	0	1	1	1	0	1	1	0	0
1019	1	33	1	0	1	1	1	1	1	1	1	0	0	1	1	0	0
1020	1	39	1	1	0	1	1	1	0	1	1	0	0	1	1	0	0
1021	1	35	1	1	1	1	1	1	1	0	1	0	1	0	1	0	0
1022	1	25	1	1	0	1	1	1	1	1	1	0	1	1	1	0	0
1023	1	31	1	0	1	1	1	1	1	1	1	1	0	1	1	0	0
1024	1	33	1	0	1	1	1	1	1	0	1	1	1	1	1	0	0
1025	1	29	1	1	0	1	1	1	1	1	1	0	1	1	0	0	0
1026	1	33	1	1	1	1	1	1	1	1	1	1	0	0	1	1	0
1027	1	33	1	0	1	1	0	0	0	0	1	1	1	0	1	1	0
1028	1	21	1	1	0	1	1	1	1	0	1	0	1	1	1	1	0
1029	1	31	1	1	1	1	1	1	0	1	1	1	1	1	1	1	0
1030	1	33	0	1	0	1	1	1	0	1	1	0	0	0	0	1	0
1031	1	25	1	0	1	1	1	1	0	0	0	1	0	1	1	1	0
1032	1	28	1	1	1	1	1	1	1	0	1	0	1	1	1	1	0
1033	1	25	1	0	1	0	1	1	1	1	1	1	0	0	1	1	0
1034	1	29	1	1	0	1	1	1	1	1	1	0	0	1	1	0	0
1035	1	20	1	0	1	1	1	1	1	0	1	0	0	0	1	1	0
1036	1	30	1	0	1	1	1	1	1	1	1	1	0	0	1	1	0
1037	1	30	1	1	1	1	1	1	1	0	1	0	1	1	0	1	0
1038	1	33	1	0	1	0	1	1	1	1	0	1	0	0	1	1	0
1039	1	42	1	0	1	1	1	1	0	1	0	1	1	1	1	1	0
1040	1	40	1	1	0	1	1	1	1	0	0	0	0	0	0	1	0
1041	1	21	1	0	1	1	1	1	0	0	0	0	0	0	1	1	1
1042	1	28	1	1	1	1	1	1	1	0	0	0	0	0	0	1	0
1043	1	27	1	1	1	1	1	1	0	0	1	1	1	1	1	1	0
1044	1	26	1	1	0	1	1	1	1	1	1	0	1	1	0	1	0
1045	1	27	1	1	1	1	1	1	0	0	1	1	1	0	0	1	0
1046	1	38	1	0	1	1	1	1	1	0	1	0	1	0	1	1	0
1047	1	27	1	1	1	1	1	1	0	0	1	1	1	0	0	1	0
1048	1	25	1	1	1	0	1	1	1	0	0	1	1	0	1	1	0
1049	1	27	1	1	0	1	1	1	1	0	0	0	1	1	0	1	0
1050	1	33	1	1	0	1	1	1	0	1	0	1	1	1	1	1	0
1051	1	26	1	1	0	1	1	1	0	0	1	0	1	1	1	1	0
1052	1	28	1	0	1	1	1	0	0	0	1	0	1	1	1	1	0
1053	1	27	1	0	1	1	1	1	0	1	1	1	1	1	1	1	0
1054	1	24	1	1	0	1	1	1	1	0	1	0	0	1	0	1	0
1055	1	28	1	1	1	1	1	1	1	0	1	0	1	1	1	1	0
1056	1	27	1	1	0	1	1	1	1	0	1	0	0	0	1	1	0
1057	1	26	1	1	1	1	1	1	0	1	1	1	1	1	1	1	0
1058	1	31	1	0	1	1	1	1	1	0	1	1	0	0	1	1	0
1059	1	30	1	0	1	1	1	1	0	1	1	1	1	1	1	1	0
1060	1	47	1	1	0	1	1	1	1	1	1	0	1	1	0	0	0
1061	1	23	1	1	1	1	1	1	0	0	0	1	1	1	0	1	0
1062	1	29	1	0	1	1	1	1	0	0	0	0	0	0	1	1	1
1063	1	26	1	1	1	1	1	1	1	0	1	1	1	0	0	1	0
1064	1	23	1	1	1	1	1	0	1	1	1	0	1	1	0	1	0
1065	1	22	1	1	1	1	1	1	1	0	1	0	1	0	1	1	0
1066	1	35	1	1	1	1	1	1	1	1	1	1	0	0	1	1	0
1067	1	27	1	1	0	1	1	1	1	1	1	1	1	1	0	1	0
1068	1	27	1	1	1	1	1	0	0	0	1	1	0	0	0	1	0
1069	1	28	1	0	1	1	1	1	1	0	1	1	0	0	1	1	0
1070	1	24	1	1	0	1	1	1	1	1	1	0	0	1	0	1	0
1071	1	23	1	0	1	0	1	1	1	0	1	1	1	1	1	1	0
1072	1	36	1	0	1	1	1	1	0	1	0	0	0	0	1	1	0
1073	1	24	1	1	1	1	1	1	1	0	1	0	0	0	1	1	0
1074	1	27	1	0	1	1	1	1	1	0	1	1	0	0	1	1	0
1075	1	28	1	1	1	1	1	1	0	0	1	0	1	1	0	1	0
1076	1	26	1	1	0	1	1	1	1	0	1	0	0	0	1	1	0
1077	1	29	1	1	0	1	1	1	1	0	1	0	1	0	1	1	0
1078	1	21	1	0	1	1	1	1	0	1	0	1	1	1	1	1	0
1079	1	23	1	1	0	1	1	1	1	0	1	0	1	1	0	1	0
1080	1	29	1	1	1	1	1	1	1	0	1	1	0	0	0	1	0
1081	1	27	1	1	1	0	1	1	1	1	1	1	0	1	1	1	0
1082	1	24	1	0	1	1	1	1	1	1	1	1	0	0	1	1	0
1083	1	23	1	0	1	1	1	1	1	0	1	1	0	0	1	1	0
1084	1	33	1	1	0	1	1	1	0	0	0	0	0	0	0	1	1
1085	1	25	1	0	1	1	1	1	1	0	1	1	1	1	1	1	0
1086	1	30	1	1	0	1	1	1	1	1	1	0	1	1	1	0	0
1087	1	18	1	1	0	1	1	1	1	0	1	0	0	0	0	1	0
1088	1	28	1	1	0	1	1	1	0	0	0	0	1	1	0	1	0
1089	1	24	1	1	0	1	1	0	0	1	1	1	0	0	1	1	0
1090	1	27	1	1	1	1	1	1	1	0	1	0	1	0	1	1	0
1091	1	30	1	1	1	1	1	1	1	1	1	1	0	1	0	1	1
1092	1	41	1	0	1	1	1	1	1	1	1	1	0	1	1	1	0
1093	1	28	1	0	1	0	1	1	1	1	1	1	0	1	1	1	0
1094	1	36	0	1	0	1	1	1	1	1	1	1	1	0	0	0	1
1095	1	31	1	1	0	1	1	1	1	0	1	0	1	1	0	1	0
1096	1	33	1	0	1	1	0	1	1	1	1	0	0	1	1	0	0
1097	1	22	1	0	1	0	1	1	0	0	0	1	0	0	1	1	1
1098	1	31	1	1	0	1	1	0	1	0	1	0	1	0	1	1	0
1099	1	24	1	1	0	1	1	1	1	0	1	0	1	1	0	1	0
1100	1	31	1	1	1	1	1	1	1	1	1	1	1	1	1	1	0
1101	1	26	1	0	1	1	1	1	1	0	1	1	0	1	1	1	0
1102	1	27	1	0	1	1	1	0	1	1	1	0	1	1	1	0	0
1103	1	46	1	0	1	1	1	1	1	1	1	1	1	1	1	1	0
1104	1	23	1	1	1	1	1	1	1	0	1	1	1	0	0	1	0
1105	1	34	1	1	0	1	1	0	1	1	1	0	1	1	0	0	0
1106	1	31	1	1	1	1	1	1	1	1	0	1	0	0	1	1	0
1107	1	25	1	1	1	1	1	1	1	0	1	1	1	1	0	1	0
1108	1	38	1	0	1	1	1	1	1	1	0	0	1	1	1	1	0
1109	1	24	1	0	1	1	1	0	0	0	1	1	0	0	1	1	0
1110	1	24	1	1	0	1	1	1	1	1	0	1	0	0	1	1	0
1111	1	20	1	0	1	1	1	1	1	0	1	0	0	0	1	1	0
1112	1	30	1	1	0	1	1	1	0	1	0	0	0	0	0	1	0
1113	1	26	1	1	1	1	1	1	1	0	0	1	1	1	1	1	0
1114	1	22	1	0	1	0	1	0	1	0	1	1	0	0	1	1	0
1115	1	25	1	0	1	1	1	1	1	1	0	1	1	1	1	1	0
1116	1	30	1	0	1	1	1	1	0	1	1	1	0	1	1	0	0
1117	1	25	1	1	0	1	1	0	0	1	1	0	0	0	0	1	1
1118	1	22	1	0	1	1	1	0	1	1	1	0	1	1	1	1	0
1119	1	23	1	1	1	1	1	1	1	1	0	0	1	1	1	1	0
1120	1	25	1	1	0	1	1	1	0	1	0	0	0	0	0	1	1
1121	1	32	1	1	1	1	1	1	1	1	1	1	0	0	1	1	0
1122	1	28	1	0	1	0	1	1	1	1	1	1	1	1	1	1	0
1123	1	26	1	0	1	1	1	1	1	1	0	0	1	1	1	1	0
1124	1	19	1	0	1	1	1	1	1	1	1	1	1	0	1	1	0
1125	1	25	1	1	0	1	1	1	1	1	1	0	1	1	0	1	0
1126	1	30	1	1	0	1	1	1	1	1	1	0	1	1	0	0	0
1127	1	36	1	0	1	1	1	1	1	1	1	1	0	0	1	1	0
1128	1	28	1	1	1	1	1	1	1	1	1	1	1	1	0	1	0
1129	1	23	1	1	0	1	1	1	1	1	1	0	1	0	1	1	0
1130	1	19	1	0	1	1	1	1	1	1	0	0	1	1	1	1	0
1131	1	21	1	0	1	1	1	1	1	1	1	0	1	0	1	0	0
1132	1	36	1	0	1	1	1	1	1	1	1	0	1	1	1	0	0
1133	1	32	1	0	1	1	1	1	1	1	0	0	1	0	1	0	0
1134	1	25	1	1	0	1	1	1	1	1	1	0	1	1	0	1	0
1135	1	28	1	1	1	1	1	1	1	1	0	0	1	0	1	1	0
1136	1	28	1	1	1	1	1	1	1	1	1	1	1	1	1	1	0
1137	1	23	1	1	1	1	1	1	1	1	0	1	0	0	0	1	0
1138	1	34	1	1	0	1	1	1	1	1	1	1	1	1	0	1	0
1139	1	23	1	1	1	1	1	1	1	1	0	1	1	1	1	1	0
1140	1	26	1	1	0	1	1	1	1	1	1	0	0	0	0	1	0
1141	1	38	0	1	1	1	1	1	1	1	1	1	0	1	1	1	0
1142	1	28	1	0	1	1	1	1	1	1	1	0	1	1	1	0	0
1143	1	29	1	0	1	1	1	1	1	1	1	1	0	0	1	1	0
1144	1	33	1	1	0	1	1	1	1	1	1	0	1	1	1	0	0
1145	1	26	1	1	0	1	1	1	1	1	1	0	1	1	1	0	0
1146	1	29	1	0	1	1	1	1	1	1	0	1	1	1	1	1	0
1147	1	24	1	1	1	0	1	1	1	1	1	1	0	0	0	1	0
1148	1	25	1	1	1	1	1	1	1	1	1	1	1	1	1	1	0
1149	1	23	1	1	0	1	1	1	1	1	0	0	1	1	0	1	1
1150	1	31	1	0	1	1	1	1	1	1	1	0	1	0	1	0	0
1151	1	25	1	1	0	1	1	1	1	1	1	0	0	1	1	0	0
1152	1	27	1	1	1	1	1	1	1	1	0	1	1	1	1	1	0
1153	1	23	1	0	1	0	1	1	1	1	0	1	0	0	1	1	0
1154	1	27	1	1	0	1	1	1	1	1	0	0	0	0	0	1	0
1155	1	34	1	1	0	1	1	1	1	1	1	0	1	0	1	1	0
1156	1	22	1	1	1	1	1	1	1	1	0	0	1	0	1	1	0
1157	1	25	1	0	1	1	1	1	1	1	1	1	1	1	1	1	0
1158	1	30	1	0	1	1	1	1	1	1	0	0	0	0	1	1	0
1159	1	28	1	1	1	1	1	1	1	1	0	0	1	0	1	1	0
1160	1	27	1	1	1	1	1	1	1	1	1	0	1	1	1	0	0
1161	1	24	1	1	0	1	1	1	0	1	0	0	1	1	0	1	0
1162	1	22	1	0	1	1	1	1	1	1	1	1	0	0	1	1	0
1163	1	28	1	1	1	1	1	0	1	1	1	0	1	0	1	0	0
1164	1	26	1	1	0	1	1	1	1	1	1	0	0	1	0	1	0
1165	1	19	1	1	0	1	1	1	1	1	1	0	1	1	0	1	0
1166	1	39	1	1	1	1	1	1	1	1	1	1	0	0	0	1	0
1167	1	36	1	1	0	1	1	1	0	1	1	0	1	0	0	1	1
1168	1	33	1	1	1	1	1	0	1	1	1	0	1	0	1	0	0
1169	1	20	1	0	1	1	1	1	1	1	1	1	0	0	1	1	0
1170	1	27	1	1	1	1	1	1	1	1	0	1	0	0	0	1	0
1171	1	30	1	1	1	1	1	1	1	1	1	1	1	1	0	1	0
1172	1	31	1	1	1	1	1	1	0	1	1	0	1	0	1	1	0
1173	1	28	1	1	0	1	1	1	1	1	1	0	1	1	1	1	0
1174	1	25	1	0	1	1	1	1	1	1	1	1	0	1	1	1	1
1175	1	26	1	1	1	1	1	1	1	1	1	1	0	0	0	1	0
1176	1	27	1	1	1	1	1	1	1	1	0	1	1	1	0	1	1
1177	1	25	1	1	1	1	1	1	1	1	1	1	0	0	0	1	0
1178	1	24	1	1	0	1	1	1	1	1	1	0	1	0	0	0	0
1179	1	34	1	1	1	1	1	1	1	1	0	1	1	1	0	1	1
1180	1	27	1	1	1	1	1	1	1	1	1	1	0	0	0	1	0
1181	1	30	1	0	1	1	1	1	0	1	1	1	0	1	1	0	0
1182	1	26	1	0	1	1	1	1	1	1	0	1	1	0	1	0	1
1183	1	26	1	0	1	1	1	1	1	1	1	1	1	0	1	1	0
1184	1	23	1	0	1	0	0	0	0	1	1	1	0	0	1	0	0
1185	1	35	1	0	1	1	0	0	0	1	0	1	0	1	1	1	0
1186	1	24	0	1	1	1	1	0	0	1	1	1	0	0	0	1	0
1187	1	30	1	1	0	0	1	1	1	1	1	0	1	0	0	1	0
1188	1	26	1	1	0	1	1	1	1	1	1	0	1	0	0	1	1
1189	1	27	1	1	0	1	1	1	0	1	1	0	1	1	0	1	0
1190	1	29	1	1	0	1	1	1	1	1	1	1	1	0	0	0	1
1191	1	24	1	1	0	1	1	1	0	1	1	0	1	1	0	1	0
1192	1	26	1	0	1	0	1	1	1	1	1	0	0	0	1	0	0
1193	1	30	1	1	0	1	1	0	0	1	1	0	1	1	0	1	0
1194	1	30	1	1	0	1	1	1	0	1	1	0	1	0	0	1	0
1195	1	35	1	1	1	1	1	1	1	1	1	1	1	0	0	1	1
1196	1	27	1	0	1	1	1	1	0	1	1	1	1	1	1	1	0
1197	1	27	1	0	1	1	1	1	1	1	1	1	0	0	1	0	1
1198	1	23	1	1	1	1	1	1	1	1	1	1	0	0	0	1	0
1199	1	25	1	0	1	0	1	0	0	1	1	0	0	0	1	1	1
1200	1	26	1	1	0	1	1	1	1	1	1	0	1	1	1	1	0
1201	1	29	1	1	0	1	1	1	0	1	1	0	0	1	1	0	0
1202	1	27	1	1	0	1	1	1	1	1	1	0	1	1	1	1	0
1203	1	29	1	1	1	1	1	1	1	1	1	1	0	0	1	1	0
1204	1	29	1	1	1	1	1	1	1	1	1	1	0	0	1	1	0
1205	1	26	1	1	0	1	1	1	1	1	0	0	0	0	1	1	0
1206	1	25	1	1	0	1	1	1	1	1	0	0	1	1	1	1	0
1207	1	27	1	1	0	1	1	1	1	1	0	0	0	0	1	1	0
1208	1	23	1	1	1	1	1	1	1	1	1	1	1	1	1	1	0
1209	1	26	1	1	0	1	1	1	1	1	1	0	0	0	1	1	0
1210	1	24	1	1	1	1	1	1	1	1	1	1	1	1	1	1	0
1211	1	25	1	1	0	1	1	1	0	1	1	0	1	1	0	1	0
1212	1	27	1	1	1	1	1	1	1	1	1	1	0	0	1	1	0
1213	1	27	1	1	1	1	1	1	1	1	1	1	0	0	1	1	0
1214	1	20	1	1	0	1	1	1	0	1	1	0	1	1	0	1	0
1215	1	25	1	1	0	1	1	1	0	1	1	0	1	1	0	1	0
1216	1	27	1	1	0	1	1	1	1	1	1	0	1	0	0	0	0
1217	1	27	1	1	0	1	1	1	1	1	1	0	0	0	1	1	0
1218	1	31	1	1	1	1	1	1	1	1	0	1	1	0	1	1	1
1219	1	23	1	1	0	1	1	1	1	1	1	0	1	0	1	1	0
1220	1	22	1	1	0	1	1	1	1	1	1	0	0	1	1	1	1
1221	1	26	1	1	0	1	1	1	1	1	1	0	0	0	1	1	0
1222	1	21	1	1	0	1	1	1	1	1	1	0	0	0	1	1	0
1223	1	28	1	0	1	1	0	1	1	1	0	1	1	1	1	1	0
1224	1	25	1	1	0	1	1	1	1	1	1	0	0	0	1	1	0
1225	1	22	1	1	1	1	1	0	0	1	1	1	0	0	1	1	0
1226	1	23	1	1	0	1	1	1	1	1	1	0	1	1	1	1	0
1227	1	21	1	0	1	1	1	1	1	1	1	1	1	1	1	1	0
1228	1	26	1	1	1	1	1	1	1	1	1	1	0	0	1	1	0
1229	1	23	1	1	1	1	1	0	0	1	1	1	0	0	1	1	0
1230	1	26	1	1	1	1	1	1	1	1	1	1	1	1	1	1	0
1231	1	25	1	0	1	1	1	1	1	1	0	1	0	0	1	1	0
1232	1	22	1	1	0	1	1	1	1	1	1	0	1	1	1	1	0
1233	1	23	1	1	1	1	1	1	1	1	1	1	1	1	1	1	0
1234	1	27	1	1	1	1	1	1	1	1	0	1	1	1	1	1	1
1235	1	26	1	1	0	1	1	1	1	1	1	0	0	0	1	1	0
1236	1	23	1	0	1	1	1	1	1	1	1	1	1	1	1	1	0
1237	1	25	1	1	1	1	1	0	0	1	1	1	0	0	1	1	0
1238	1	26	1	1	1	1	1	1	1	1	0	1	0	1	1	1	1
1239	1	20	1	1	0	1	1	1	1	1	1	0	0	1	1	1	1
1240	1	27	1	1	1	1	1	1	1	1	1	1	0	0	1	1	0
1241	1	24	1	1	0	1	1	1	1	1	1	0	0	1	1	1	1
1242	1	23	1	1	0	1	1	1	1	1	1	0	1	1	1	1	0
1243	1	25	1	1	0	1	1	1	1	1	1	0	1	1	1	1	0
1244	1	30	1	1	1	1	1	1	1	1	0	0	0	0	1	1	0
1245	1	26	1	1	0	1	1	1	1	1	1	0	1	1	1	1	0
1246	1	28	1	1	1	1	1	1	1	1	1	1	0	0	1	1	0
1247	1	25	1	1	0	1	1	1	1	1	1	0	0	0	1	1	0
1248	1	24	1	0	1	1	1	0	0	1	1	1	0	0	1	1	0
1249	1	26	1	1	1	1	1	1	1	1	1	1	1	1	1	1	0
1250	1	29	1	1	0	1	1	1	0	1	1	0	0	1	1	0	0
1251	1	27	1	0	1	0	1	1	1	1	1	1	1	0	1	1	0
1252	1	23	1	1	0	1	1	1	0	1	1	0	1	1	0	1	0
1253	1	26	1	1	1	1	1	1	1	1	1	0	0	0	1	1	0
1254	1	26	1	0	1	1	1	1	1	1	1	1	1	1	1	1	0
1255	1	28	1	0	1	1	1	1	1	1	0	0	0	0	1	1	0
1256	1	25	1	1	1	1	1	1	1	1	1	1	0	0	0	1	0
1257	1	27	1	1	1	1	1	1	1	1	1	1	0	1	0	1	1
1258	1	28	1	1	0	1	1	1	1	1	1	0	1	1	0	1	0
1259	1	25	1	0	1	1	1	1	0	1	1	0	0	1	1	0	0
1260	1	28	1	1	0	1	1	1	1	1	1	1	1	0	0	1	1
1261	1	31	1	1	0	1	1	1	0	1	0	0	0	0	0	1	1
1262	1	25	1	1	1	1	1	1	1	1	1	0	1	0	1	1	0
1263	1	27	1	0	1	1	1	1	0	1	1	0	0	0	1	0	1
1264	1	26	1	1	0	1	1	1	0	1	0	0	1	1	1	0	0
1265	1	22	1	0	1	0	1	1	1	1	1	0	0	0	1	1	0
1266	1	24	0	1	0	1	1	1	0	1	0	0	0	1	0	1	0
1267	1	27	1	0	1	1	0	0	0	1	0	0	1	1	1	0	0
	1=Han;0=Kazak		0=yes;1=no	0=Junior middle school or below;1= above junior middle school	0=yes 1=no	0=income＜2000;1=income＜2000	0=yes;1=no	0=yes;1=no	0=yes;1=no	0=yes;1=no	0=yes;1=no	0=yes;1=no	0=yes;1=no	0=mother-in-law;1=others	0=yes;1=no	0=yes;1=no	1=yes;0=no
